1 **Semantic representations during language comprehension are affected by context**

2 Fatma Deniz<sup>\*a, b</sup>, Christine Tseng<sup>\*a</sup>, Leila Wehbe<sup>c</sup>, Jack L. Gallant<sup>a, d</sup>

3

4 <sup>a</sup>Helen Wills Neuroscience Institute, University of California, Berkeley, CA 94720, USA

5 <sup>b</sup>Institute of Software Engineering and Theoretical Computer Science, Technische Universität Berlin,  
6 Berlin, Germany

7 <sup>c</sup>Machine Learning Department, Carnegie Mellon University, Pittsburgh, PA 15213, USA

8 <sup>d</sup>Department of Psychology, University of California, Berkeley, CA 94720, USA

9 <sup>\*</sup>all authors contributed equally and are listed alphabetically

10

11 Corresponding author: Jack L. Gallant <[gallant@berkeley.edu](mailto:gallant@berkeley.edu)>

12

13 Abbreviated title: Context affects SNR and semantic representations

14

15 Number of pages: 41

16 Number of figures: 5

17 Number of words: Abstract: 250; Significance Statement: 85; Introduction: 648; Discussion: 1437

18

19 Conflict of interest: The authors declare no competing financial interests.

20

21 Acknowledgments: CT was supported by the National Science Foundation (NSF Nat-1912373) and  
22 UC Berkeley internal funds. FD was supported by the FITweltweit-Program of the German Academic  
23 Exchange Service (DAAD), the Moore and Sloan Data Science Environment Postdoctoral Fellowship,  
24 and the Federal Ministry of Education and Research (BMBF 01GQ1906). LW was supported by  
25 startup funds from the Machine Learning Department at Carnegie Mellon University.

## 26 **Abstract**

27 The meaning of words in natural language depends crucially on context. However, most  
28 neuroimaging studies of word meaning use isolated words and isolated sentences with little context.  
29 Because the brain may process natural language differently from how it processes simplified stimuli,  
30 there is a pressing need to determine whether prior results on word meaning generalize to natural  
31 language. We investigated this issue by directly comparing the brain representation of semantic  
32 information across four conditions that vary in context. fMRI was used to record human brain activity  
33 while four subjects (two female) read words presented in four different conditions: narratives  
34 (Narratives), isolated sentences (Sentences), blocks of semantically similar words (Semantic Blocks),  
35 and isolated words (Single Words). Using a voxelwise encoding model approach, we find two clear  
36 and consistent effects of increasing context. First, stimuli with more context (Narratives, Sentences)  
37 evoke brain responses with substantially higher SNR across bilateral visual, temporal, parietal, and  
38 prefrontal cortices compared to stimuli with little context (Semantic Blocks, Single Words). Second,  
39 increasing context increases the representation of semantic information across bilateral temporal,  
40 parietal, and prefrontal cortices at the group level. However, in individual subjects, only natural  
41 language stimuli (Narratives) consistently evoke widespread representation of semantic information  
42 across the cortical surface. These results show that context has large effects on both the quality of  
43 neuroimaging data and on the representation of meaning in the brain, and they imply that the results  
44 of neuroimaging studies that use stimuli with little context may not generalize well to the natural  
45 regime.

## 46 **Significance Statement**

47 Context is an important part of understanding the meaning of natural language, but most  
48 neuroimaging studies of meaning use isolated words and isolated sentences with little context. Here  
49 we examined whether the results of neuroimaging studies that use out-of-context stimuli generalize to  
50 natural language. We find that increasing context improves the quality of neuroimaging data and  
51 changes where semantic information is represented in the brain. These results suggest that findings  
52 from studies using out-of-context stimuli may not generalize to natural language used in daily life.

## 53 **Introduction**

54 Language is our main means of communication and an integral part of daily life. Natural language  
55 comprehension requires extracting meaning from words that are embedded in context. However,  
56 most neuroimaging studies of word meaning use simplified stimuli consisting of isolated words or  
57 sentences (Price, 2012). Natural language differs from isolated words and sentences in several ways.  
58 Natural language contains phonological and orthographic patterns, lexical semantics, syntactic  
59 structure, and compositional- and discourse-level semantics embedded in social context (Hagoort,  
60 2019). In contrast, isolated words and sentences only contain a few of these components (e.g., lexical  
61 meaning, local syntactic structure). (For concision, this paper will refer to all differences between  
62 natural language and isolated words/sentences as differences in “context.”)

63

64 Neuroimaging studies that use isolated words and sentences implicitly assume that their results will  
65 generalize to natural language. However, because the brain is a highly nonlinear dynamical system  
66 (Wu et al., 2006; Breakspear, 2017), the representation of semantic information may change  
67 depending on context (Poeppel et al., 2012; Hagoort, 2019; Hamilton and Huth, 2020). Indeed,  
68 contextual effects have been demonstrated clearly in other domains. For example, many neurons in  
69 the visual system respond differently to simplified stimuli compared to naturalistic stimuli (Simoncelli  
70 and Olshausen, 2001; Ringach et al., 2002; David et al., 2004; Touryan et al., 2005). However, few  
71 studies have examined whether insights about semantic representation from studies using simplified  
72 stimuli will generalize to natural language.

73

74 Results from past studies suggest that context has a large effect on semantic representation. Several  
75 natural language studies from our lab reported that semantic information is represented in a large,  
76 distributed network of brain regions including bilateral temporal, parietal, and prefrontal cortices (Huth  
77 et al., 2016; Deniz et al., 2019). In contrast, studies that used isolated words or sentences as stimuli  
78 only identified a few brain regions that represent semantic information (left IFG, anterior temporal

79 lobe, inferotemporal cortex, and posterior parietal cortex; for reviews see (Binder et al., 2009; Price,  
80 2010, 2012)).

81

82 One way that context might affect neuroimaging results is by affecting the signal-to-noise ratio (SNR)  
83 of evoked brain responses. Although no language studies have explicitly looked at evoked BOLD  
84 SNR, several converging lines of evidence suggest that context does affect evoked SNR in language  
85 studies. (Lerner et al., 2011) examined how language context affects cross-subject correlations in  
86 brain responses, and they reported that as the amount of context increased, the number of voxels  
87 that were correlated across subjects also increased. In addition, several contrast-based fMRI  
88 language studies reported that increasing context evoked larger and more widespread patterns of  
89 brain activity (Mazoyer et al., 1993; Xu et al., 2005; Jobard et al., 2007). Finally, most subjects are  
90 more attentive when reading natural stories than when reading isolated words, and attention affects  
91 BOLD SNR (Bressler and Silver, 2010).

92

93 Another more interesting way that context might affect neuroimaging results is by directly changing  
94 semantic representations in the brain. Context can change the way that subjects attend to semantic  
95 information, and semantic representations in many brain areas shift toward attended semantic  
96 categories (Çukur et al., 2013; Sprague et al., 2015; Nastase et al., 2017). Context also changes the  
97 statistical structure of language stimuli, and these statistical changes can affect cognitive processes  
98 and representations in a variety of ways (Wu et al., 2006; Dahmen et al., 2010; Breakspear, 2017).

99

100 To test the hypotheses that context affects evoked SNR and semantic representations, we used fMRI  
101 and a voxelwise encoding model approach to directly compare four stimulus conditions that vary in  
102 context: Narratives, Sentences, Semantic Blocks, and Single Words (Figure 1). The Narratives  
103 condition consisted of four narrative stories used in our previous studies (Huth et al., 2016; Deniz et  
104 al., 2019; Popham et al., 2021). The other three conditions used sentences, blocks of semantically

105 similar words, and individual words sampled from the narratives in Huth et al. (2016), Deniz et al.  
106 (2019), and Popham et al. (2021).

107

## 108 **Materials and Methods**

### 109 Experimental Design and Statistical Analysis

110 Subjects. Functional data were collected from two males and two females: S1 (male, age 31), S2  
111 (male, age 24), S3 (female, age 24), S4 (female, age 23). All subjects were healthy and had normal  
112 hearing, and normal or corrected-to-normal vision. All subjects were right handed according to the  
113 Edinburgh handedness inventory (Oldfield, 1971). Laterality scores were +70 (decile R.3) for S1, +95  
114 (decile R.9) for S2, +90 (decile R.7) for S3, +80 (decile R.5) for S4.

115

116 MRI data collection. MRI data were collected on a 3T Siemens TIM Trio scanner with a 32-channel  
117 Siemens volume coil, located at the UC Berkeley Brain Imaging Center. Functional scans were  
118 collected using gradient echo EPI with repetition time (TR) = 2.0045s, echo time (TE) = 31ms, flip  
119 angle = 70 degrees, voxel size = 2.24 x 2.24 x 4.1 mm (slice thickness = 3.5 mm with 18% slice gap),  
120 matrix size = 100 x 100, and field of view = 224 x 224 mm. Thirty axial slices were prescribed to cover  
121 the entire cortex and were scanned in interleaved order. A custom-modified bipolar water excitation  
122 radiofrequency (RF) pulse was used to avoid signal from fat. Anatomical data were collected using a  
123 T1-weighted multi-echo MP-RAGE sequence on the same 3T scanner. Approximately 3.5 hours  
124 (214.85 minutes) of fMRI data was collected for each subject.

125

126 fMRI data pre-processing. The FMRIB Linear Image Registration Tool (FLIRT) from FSL 5.0  
127 (Jenkinson and Smith, 2001; Jenkinson et al., 2002) was used to motion-correct each functional run.  
128 A high-quality template volume was then created for each run by averaging all volumes in the run  
129 across time. FLIRT was used to automatically align the template volume for each run to an overall  
130 template, which was chosen to be the temporal average of the first functional run for each subject.

131 These automatic alignments were manually checked and adjusted as necessary to improve accuracy.  
132 The cross-run transformation matrix was then concatenated to the motion-correction transformation  
133 matrices obtained using MCFLIRT, and the concatenated transformation was used to resample the  
134 original data directly into the overall template space.

135

136 A 3rd order Savitsky-Golay filter with a 121-TR window was used to identify low-frequency voxel  
137 response drift. This drift was subtracted from the signal before further processing. Responses for  
138 each run were z-scored separately before voxelwise modeling. In addition, 10 TRs were discarded  
139 from the beginning and the end (20 TRs total) of each run.

140

141 Cortical surface reconstruction and visualization. Freesurfer (Dale et al., 1999) was used to generate  
142 cortical surface meshes from the T1-weighted anatomical scans. Before surface reconstruction,  
143 Blender and pycortex (<http://pycortex.org>; (Gao et al., 2015)) were used to carefully hand-check and  
144 correct anatomical surface segmentations. To aid in cortical flattening, Blender and pycortex were  
145 used to remove the surface crossing the corpus callosum and relaxation cuts were made into the  
146 surface of each hemisphere. The calcarine sulcus cut was made at the horizontal meridian in V1 as  
147 identified from retinotopic mapping data.

148

149 Pycortex (Gao et al., 2015) was used to align functional images to the cortical surface. The line-  
150 nearest scheme in pycortex was used to project functional data onto the surface for visualization and  
151 subsequent analysis. The line-nearest scheme samples the functional data at 64 evenly-spaced  
152 intervals between the inner (white matter) and outer (pial) surfaces of the cortex and averages the  
153 samples. Samples are taken using nearest-neighbor interpolation, in which each sample is given the  
154 value of its enclosing voxel.

155

156 Stimuli. Stimuli for all four conditions were generated from ten spoken stories from The Moth Radio

157 Hour (used previously in (Huth et al., 2016)). In each story, a speaker tells an autobiographical story  
158 in front of a live audience. The ten selected stories are 10-15 min long, cover a wide range of topics,  
159 and are highly engaging. Transcriptions of these stories were used to generate the stimuli.

160

161 Story transcription. Each story was manually transcribed by one listener, and this transcription was  
162 checked by a second listener. Certain sounds (e.g., laughter, lip-smacking, and breathing) were also  
163 transcribed in order to improve the accuracy of the automated alignment. The audio of each story was  
164 downsampled to 11.5 kHz and the Penn Phonetics Lab Forced Aligner (P2FA; (Yuan and Liberman,  
165 2008)) was used to automatically align the audio to the transcript. P2FA uses a phonetic hidden  
166 Markov model to find the temporal onset and offset of each word and phoneme. The Carnegie Mellon  
167 University pronouncing dictionary was used to guess the pronunciation of each word. The Arpabet  
168 phonetic notation was used when necessary to manually add words and word fragments that  
169 appeared in the transcript but not in the pronouncing dictionary.

170

171 After automatic alignment was complete, Praat (Boersman and Weenink, 2014) was used to manually  
172 check and correct each aligned transcript. The corrected, aligned transcript was then spot-checked  
173 for accuracy by a different listener. Finally, Praat's TextGrid object was used to convert the aligned  
174 transcripts into word representations. The word representation of each story is a list of pairs (W, t),  
175 where W is a word and t is the time in seconds.

176

177 Stimulus Conditions. To evaluate the effect of context on evoked SNR and semantic representation in  
178 the brain, four stimulus conditions with different amounts of context were created. These four  
179 conditions were Narratives, Sentences, Semantic Blocks, and Single Words.

180

181 The Narratives condition consisted of four narratives from The Moth Radio Hour ("undertheinfluence",  
182 "souls", "life", "wheretheressmoke"). These four narratives were chosen from the ten narratives used



183 in (Huth et al., 2016). Each narrative was presented in a separate ~10-minute scanning run. One  
184 narrative (“wheretheressmoke”) was used as the model validation stimulus, and it was presented  
185 twice for each subject.

186

187 The Sentences condition consisted of sentences randomly sampled from the ten narratives used in  
188 (Huth et al., 2016). Sentence boundaries were marked manually, resulting in 1450 sentences with a  
189 median sentence length of 13 words (min=5 words, max=40 words). Sentences were presented in  
190 four unique ~10-minute scanning runs. One run was used as the model validation stimulus, and it  
191 was presented twice for each subject.

192

193 The Semantic Blocks condition consisted of blocks of clustered words from the ten narratives used in  
194 (Huth et al., 2016). The word clusters were designed to elicit maximally different voxel responses. To  
195 create the clusters, each word was first transformed into its semantic model representation (see  
196 Voxelwise model fitting below). The semantic model representation for each word was then projected  
197 onto the first ten principal components of the semantic model weights estimated in (Huth et al., 2016).  
198 Finally, the projections were clustered with k-means clustering (k=12) to create 12 word clusters.  
199 During each scanning run, subjects saw 12 different blocks of 114 words each. The words in each  
200 block were sampled from one of the word clusters, and eight different word clusters were sampled in  
201 each run. The frequency with which each cluster was sampled was matched to the frequency with  
202 which words from that cluster appeared in the ten narratives. Blocks were presented in four unique  
203 ~10-minute long runs. One run was used as the model validation stimulus, and it was presented twice  
204 for each subject.

205

206 The Single Words condition consisted of words randomly sampled without replacement from the ten  
207 narratives used in (Huth et al., 2016). There were 21743 appearances of 2868 unique words across  
208 the narratives, and each appearance was sampled uniformly. Words were presented in four unique

209 10-minute scanning runs. One run was used as the model validation stimulus, and it was presented  
210 twice for each subject.

211

212 For the Sentences, Semantic Blocks, and Single Words conditions, text descriptions of auditory  
213 sounds (e.g., laughter and applause) in the ten narratives were removed. In addition, obvious  
214 transcription errors were removed from the list of narrative words for the Semantic Blocks and Single  
215 Words conditions. Words that did not make sense by themselves (e.g., “tai”, “chi”) were also  
216 removed. There were five such words: “tai”, “chi”, “deja”, “vu”, and “sub.”

217

218 Stimulus presentation. In all conditions, words were presented individually at the center of the screen  
219 using Rapid Serial Visual Presentation (RSVP) (Forster, 1970; Buchweitz et al., 2009). Words in the  
220 Narratives and Sentences conditions were presented with the same timing and duration as in the  
221 original spoken stories. Words in the Semantic Blocks and Single Words conditions were presented  
222 for a baseline of 400 ms with an additional 10 ms for every character. For example, the word “apple”  
223 would be presented for  $400 \text{ ms} + 10 \text{ ms/character} * (5 \text{ characters}) = 450 \text{ ms}$ .

224

225 The pygame library in Python was used to display black text on a gray background at 34 horizontal  
226 and 27 vertical degrees of visual angle. Letters were presented at average 6 (min=1, max=16)  
227 horizontal and 3 vertical degrees of visual angle. A white fixation cross was present at the center of  
228 the display. Subjects were asked to fixate while reading the text. Eye movements were monitored at  
229 60 Hz throughout the scanning sessions using a custom-built camera system equipped with an  
230 infrared source (Avotec) and the ViewPoint EyeTracker software suite (Arrington Research). The eye  
231 tracker was calibrated before each session of data acquisition.

232

233 Explainable variance (EV). To measure the functional SNR of each stimulus condition, we computed  
234 the explainable variance (EV). EV was computed as the amount of variance in the response of a

235 voxel that can be explained by the mean response of the voxel across multiple repetitions of the  
236 same stimulus. Formally, if the responses of a voxel to a repeated stimulus is expressed as a matrix  
237  $Y$  with dimensions (# of TRs in each repetition, # of stimulus repetitions), then EV is given by  
238 
$$1 - [\text{variance}(Y - \text{mean}(Y, \text{axis}=1)) / \text{variance}(Y)].$$

239 Note that this is the same as the coefficient of determination ( $R^2$ ) where the model prediction is the  
240 mean response across stimulus repetitions. For each condition, EV was computed from the two  
241 repeated validation runs.

242

243 Voxelwise model fitting and validation. To identify voxels that represent semantic information, a  
244 linearized finite impulse response (FIR) encoding model (Nishimoto et al., 2011; Huth et al., 2012,  
245 2016) was fit to every cortical voxel in each subject's brain. The linearized FIR encoding model  
246 consisted of one feature space designed to represent semantic information in the stimuli, and four  
247 feature spaces designed to represent low-level linguistic information. In the semantic feature space,  
248 the semantic content of each word was represented by the word's co-occurrence statistics with the  
249 985 words in Wikipedia's List of 1000 basic words (Huth et al., 2016). Thus, each word was  
250 represented by a 985-long vector in the semantic feature space. The co-occurrence statistics were  
251 computed over a large text corpus that included the ten narrative stories used in Huth et al. (2016),  
252 several books from Project Gutenberg, a wide variety of Wikipedia pages, and a broad selection of  
253 reddit.com user comments (Huth et al., 2016). The four low-level feature spaces were word rate (1  
254 parameter), letter rate (1 parameter), letters (26 parameters), and word length variation per TR (1  
255 parameter). Together, the five feature spaces had 1014 features.

256

257 The features passed through three additional preprocessing steps before being fit to BOLD  
258 responses. First, to account for the hemodynamic response, a separate linear temporal filter with four  
259 delays was fit for each of the 1014 features, resulting in 4056 final features. This was accomplished  
260 by concatenating copies of the features delayed by 1, 2, 3, and 4 TRs (approximately 2, 4, 6, and 8

261 seconds). Taking the dot product of this concatenated feature space with a set of linear weights is  
262 functionally equivalent to convolving the undelayed features with a linear temporal kernel that has  
263 non-zero entries for 1-, 2-, 3-, and 4-time point delays. Second, 10 TRs were discarded from the  
264 beginning and the end (20 TRs total) of each run. Third, each feature was z-scored separately within  
265 each run. This was done so that the features would be on the same scale as the BOLD responses,  
266 which were also z-scored within each run.

267

268 A single joint model consisting of the 4056 features were fit to BOLD responses using banded ridge  
269 regression (Nunez-Elizalde et al., 2019) and the himalaya Python package (see Code Accessibility).  
270 A separate model was fit for every voxel in every subject and condition. For every model, a  
271 regularization parameter was estimated for each of the five feature spaces using a random search. In  
272 the random search, 1000 normalized hyperparameter candidates were sampled from a Dirichlet  
273 distribution and scaled by 30 log-spaced values ranging from  $10^{-5}$  to  $10^{20}$ . The best normalized  
274 hyperparameter candidate and scaling were selected for each feature space for each voxel. Finally,  
275 models were fit again on the BOLD responses with the selected hyperparameters.

276

277 To validate the models, estimated feature weights were used to predict responses to a separate,  
278 held-out validation dataset. Validation stimuli for the Narratives condition consisted of two repeated  
279 presentations of the narrative “wheretheressmoke” (Huth et al., 2016). Validation stimuli for the  
280 Sentences, Semantic Blocks, and Single Words conditions consisted of two repeated presentations of  
281 one run for each condition. Prediction accuracy was then computed as the Pearson’s correlation  
282 coefficient between the model-predicted BOLD response and the average BOLD response across the  
283 two validation runs. Statistical significance for each condition was computed with permutation testing.  
284 A null distribution was generated by permuting 10-TR blocks of the average validation BOLD  
285 response 5000 times and computing the prediction accuracy for each permutation. Resulting p values  
286 were corrected for multiple comparisons within each subject using the false discovery rate (FDR)

287 procedure (Benjamini and Hochberg, 1995).

288

289 All model fitting and analysis was performed using custom software written in Python, making heavy  
290 use of NumPy (Oliphant, 2006) and SciPy (Jones et al., 2001). Analysis and visualizations were  
291 developed using iPython (Perez and Granger, 2007), and the interactive programming and  
292 visualization environment jupyter notebook (Kluyver et al., 2016).

293

294 Code Accessibility. The himalaya package is publicly available on GitHub  
295 (<https://github.com/gallantlab/himalaya>).

296

## 297 **Results**

298 The goal of this study was to understand whether context affects evoked SNR and semantic  
299 representations in the brain. Previous studies suggest that both evoked SNR and semantic  
300 representations will differ across the four experimental conditions (Single Words, Semantic Blocks,  
301 Sentences, and Narratives). Here, we analyzed evoked SNR and semantic representations for each  
302 of the four conditions in individual subjects.

303

304 To estimate evoked SNR, we computed the reliability of voxel responses across repetitions of the  
305 same stimulus. Several different sources of noise can influence the variability of voxel responses  
306 across stimulus repetitions: magnetic inhomogeneity, voxel response variability, and variability in  
307 subject attention or vigilance. Because these sources are independent across stimulus repetitions,  
308 pooling voxel responses across repetitions averages out the noise and provides a good estimate of  
309 the evoked SNR. In this study, we used explainable variance (EV) as a measure of reliability and  
310 computed the EV for two repetitions of one run in each condition to estimate evoked SNR (see  
311 Methods).

312

313 Figure 3 shows EV for the four conditions in one typical subject (S1) (see Extended Data Figure 3-1  
314 for voxels with significant EV; see Extended Data Figure 3-2 for unthresholded EV for subjects 2-4).  
315 In the Single Words condition, appreciable EV is only found in a few scattered voxels located in  
316 bilateral primary visual cortex, STS, and IFG (Figure 3a). The number of voxels with significant EV  
317 ( $p < 0.05$ , FDR-corrected) in the Single Words condition is 256, 1198, 0, and 0 for subjects 1-4,  
318 respectively. A similar pattern is seen in the Semantic Blocks condition, where appreciable EV is only  
319 found in a few scattered voxels located in bilateral primary visual cortex, STS, and IFG (Figure 3b).  
320 The number of voxels with significant EV ( $p < 0.05$ , FDR-corrected) in the Semantic Blocks condition is  
321 324, 1613, 1201, and 0 for subjects 1-4, respectively. In contrast, both the Sentences and Narratives  
322 conditions produce high EV in many voxels located in bilateral visual, parietal, temporal, and  
323 prefrontal cortices (Figures 3c and 3d). The number of voxels with significant EV ( $p < 0.05$ , FDR-  
324 corrected) in the Sentences condition is 4225, 11697, 2359, and 7251 for subjects 1-4, respectively.  
325 The number of voxels with significant EV ( $p < 0.05$ , FDR-corrected) in the Narratives condition is 7622,  
326 8062, 7059, and 2931 for subjects 1-4, respectively. Together, these results show that increasing  
327 context increases evoked SNR in bilateral visual, temporal, parietal, and prefrontal cortices.

328

329 To quantify semantic representation, we used a voxelwise encoding model (VM) procedure and a  
330 semantic feature space to identify voxels that represent semantic information in each condition  
331 (Figure 2). We first extracted semantic features from the stimulus words in each condition separately  
332 (see Methods). We then used banded ridge regression (Nunez-Elizalde et al., 2019) to fit a separate  
333 semantic encoding model for each voxel, subject, and condition. Here we refer to voxels that were  
334 predicted significantly by the semantic model (see Methods) as “semantically selective voxels.”

335

336 Figure 4 shows semantic model prediction accuracy for semantically selective voxels for the four  
337 conditions in one typical subject (S1) (see Extended Data Figure 4-1 for additional subjects; see  
338 Extended Data Figure 4-2 for unthresholded semantic model prediction accuracy for all subjects). In

339 the Single Words condition, no voxels are semantically selective in any of the four subjects (Figure  
340 4a,  $p < 0.05$ , FDR corrected). In the Semantic Blocks condition, scattered voxels along the left STS  
341 and left IFG are semantically selective (Figure 4b,  $p < 0.05$ , FDR corrected). The number of  
342 semantically selective voxels ( $p < 0.05$ , FDR corrected) in the Semantic Blocks condition is 652, 0,  
343 811, and 0 for subjects 1-4, respectively. In the Sentences condition, voxels in the left angular gyrus,  
344 left STG, bilateral STS, bilateral ventral precuneus, bilateral ventral premotor speech area (sPMv),  
345 bilateral superior frontal sulcus (SFS), and left superior frontal gyrus (SFG) are semantically selective  
346 (Figure 4c,  $p < 0.05$ , FDR corrected). The number of semantically selective voxels ( $p < 0.05$ , FDR-  
347 corrected) in the Sentences condition is 1626, 3099, 0, and 0 for subjects 1-4, respectively. Finally, in  
348 the Narratives condition, voxels in bilateral angular gyrus, bilateral STS, bilateral STG, bilateral  
349 temporal parietal junction (TPJ), bilateral sPMv, bilateral ventral precuneus, bilateral SFS, bilateral  
350 SFG, bilateral inferior frontal gyrus, left inferior parietal lobule (IPL), and left posterior cingulate gyrus  
351 are semantically selective (Figure 4d,  $p < 0.05$ , FDR corrected). The number of semantically selective  
352 voxels ( $p < 0.05$ , FDR-corrected) in the Narratives condition is 4505, 7340, 7607, and 1791 for  
353 subjects 1-4, respectively. Together, these results suggest that increasing context increases the  
354 representation of semantic information in bilateral temporal, parietal, and prefrontal cortices. These  
355 results also suggest that this effect is highly variable in individual subjects for non-natural language  
356 stimuli (Semantic Blocks, Sentences) but not for natural language stimuli (Narratives).

357

358 The results presented in Figure 4 were obtained in each subject's native brain space. To determine  
359 how the representation of semantic information varies across subjects for the four conditions, we  
360 transformed the semantic encoding model results obtained for each subject into the standard MNI  
361 brain space (Deniz et al., 2019). Figure 5 shows the mean unthresholded model prediction accuracy  
362 across subjects (Figure 5a-d) and the number of subjects for which each voxel is semantically  
363 selective (Figure 5e-h) for each condition. In the Single Words condition, no voxels are semantically  
364 selective in any of the four subjects (Figure 5a and 5e,  $p < 0.05$ , FDR corrected). In the Semantic



365 Blocks condition, scattered voxels in left STS are semantically selective in two out of four subjects  
366 (Figure 5b and 5f,  $p < 0.05$ , FDR corrected). In the Sentences condition, voxels in the bilateral STS,  
367 left STG, bilateral ventral precuneus, bilateral angular gyrus, bilateral SFS, and bilateral premotor  
368 cortex are semantically selective in two out of four subjects (Figure 5c and 5g,  $p < 0.05$ , FDR  
369 corrected). Finally, in the Narratives condition, voxels in bilateral angular gyrus, bilateral STS, right  
370 STG, right anterior temporal lobe, bilateral SFS and SFG, left IFG, left IPL, bilateral ventral  
371 precuneus, and bilateral posterior cingulate gyrus are semantically selective in all subjects (Figure 5d  
372 and 5h,  $p < 0.05$ , FDR corrected), and voxels in left STG and right IFG are semantically selective in  
373 three out of four subjects (Figure 5d and 5h,  $p < 0.05$ , FDR corrected). These results are consistent  
374 with those in Figure 4, and they suggest that increasing stimulus context increases the representation  
375 of semantic information across the cortical surface at the group level. In addition, this effect is  
376 inconsistent across individual subjects for non-natural stimuli (Semantic Blocks, Sentences) but not  
377 natural stimuli (Narratives).

378

379 Because the Narratives condition contains more contextual information than the other three  
380 conditions, we hypothesized that we would find more semantically selective voxels in the Narratives  
381 condition than in the other three conditions. To test this, we calculated the difference in the number of  
382 semantically selective voxels between the Narratives condition and each of the other three conditions.  
383 The difference between the Narratives and Single Words conditions is 4505, 7340, 7607, and 1791  
384 voxels for subjects 1-4, respectively ( $p < 0.05$  for all subjects). The difference between the Narratives  
385 and Semantic Blocks conditions is 3853, 7340, 6796, and 1791 voxels for subjects 1-4, respectively  
386 ( $p < 0.05$  for all subjects). Finally, the difference between the Narratives and Sentences conditions is  
387 2879, 4241, 7607, and 1791 voxels for subjects 1-4, respectively ( $p < 0.05$  for all subjects). The  
388 difference between the Narratives and Single Words conditions partly reflects the fact that most  
389 voxels have low evoked SNR in the Single Words condition and high evoked SNR in the Narratives  
390 condition (Figure 3). Because it is impossible to model noise, differences in evoked SNR across



391 conditions directly affect the number of voxels that achieve a significant model fit. The difference  
392 between the Narratives and Semantic Blocks conditions also partly reflects differences in evoked  
393 SNR -- for most voxels, evoked SNR is low in the Semantic Blocks condition and high for the  
394 Narratives condition (Figure 3). In contrast, the evoked SNR is high for many voxels in both the  
395 Narratives and the Sentences conditions (Figure 3), so the difference in the number of semantically  
396 selective voxels is unlikely to be due to differences in evoked SNR. Instead, this result suggests that  
397 semantic information is represented more widely across the cortical surface in the Narratives  
398 condition than in the Sentences condition.

399

## 400 **Discussion**

401 The aim of this study was to determine whether and how context affects semantic representations in  
402 the human brain. Our results show that both evoked SNR and semantic representations are affected  
403 by the amount of context in the stimulus. First, stimuli with relatively more context (Narratives,  
404 Sentences) evoke brain responses with higher SNR compared to stimuli with relatively less context  
405 (Semantic Blocks, Single Words) (Figure 3). Second, increasing the amount of context increases the  
406 representation of semantic information across the cortical surface at the group level (Figures 4, 5).  
407 However, in individual subjects, only the Narratives condition consistently increased the  
408 representation of semantic information compared to the Single Words condition (Figures 4, 5). These  
409 results imply that neuroimaging studies that use isolated words or sentences do not fully map the  
410 functional brain representations that underlie natural language comprehension.

411

412 Our observations that increasing context increases both the evoked SNR and the cortical  
413 representation of semantic information at the group level are fully consistent with results from  
414 previous neuroimaging studies. Several previous studies found that stimuli with more context evoke  
415 larger, more widespread patterns of brain activity (Mazoyer et al., 1993; Xu et al., 2005; Jobard et al.,  
416 2007), that brain activity evoked for individual words is modulated by context (Just et al., 2017), and

417 that brain activity evoked by stimuli with more context are more reliable than those evoked by stimuli  
418 with less context (Lerner et al. 2011). Furthermore, previous studies that used narrative stimuli  
419 (Wehbe et al., 2014; Huth et al., 2016; Pereira et al., 2018; Deniz et al., 2019; Hsu et al., 2019;  
420 Popham et al., 2021) identified many more voxels involved in semantic processing than studies that  
421 used isolated words or sentences (for reviews see (Binder et al., 2009; Price, 2010, 2012)).  
422  
423 However, there are several important differences between the results we reported here and those  
424 reported in previous neuroimaging studies. First, the 2011 study by Lerner et al. only found voxels  
425 with reliable responses in bilateral temporal gyrus and posterior inferior frontal sulcus when using  
426 isolated sentences. In contrast, we found many voxels with high EV across bilateral temporal,  
427 parietal, and frontal cortices in the Sentences condition (Figure 3). Second, past studies that used  
428 isolated sentences found left IFG involved in semantic processing (Constable et al., 2004; Rodd et  
429 al., 2005; Humphries et al., 2007). In contrast, we did not find any semantically selective voxels in the  
430 Sentences condition for two out of four subjects. Of the remaining two subjects, only one subject had  
431 semantically selective voxels in left IFG in the Sentences condition (Figures 4 and 5). Third, past  
432 studies that used isolated words found bilateral STS, bilateral lateral sulcus, left IFG, left MTG, and  
433 left ITG involved in semantic processing (Mazoyer et al., 1993; Booth et al., 2002; Xu et al., 2005;  
434 Jobard et al., 2007; Lerner et al., 2011). In contrast, we did not find any semantically selective voxels  
435 in the Single Words condition (Figures 4 and 5). Finally, one previous study looked at brain activity  
436 evoked by a stimulus conceptually similar to Semantic Blocks (Mollica et al., 2020). In the study,  
437 Mollica et al. (2020) used sentences that were scrambled such that nearby words could be combined  
438 into meaningful phrases. They found that the brain activity evoked by scrambled sentences was  
439 similar to the brain activity evoked by unscrambled sentences in left IFG, left middle frontal gyrus, left  
440 temporal lobe, and left angular gyrus. In contrast, we only found voxels that were semantically  
441 selective in both the Semantic Blocks and Sentences conditions in left STS (Figures 4 and 5).  
442

443 The inconsistencies between this study and past studies most likely stem from four major  
444 methodological differences between this study and those earlier studies. First, we avoided smoothing  
445 our data before performing analyses. We performed our analyses for each subject in their native brain  
446 space, and we did not perform any spatial smoothing across voxels. In contrast, most previous  
447 studies performed normalization procedures to transform their data into a standard brain space and  
448 applied a spatial smoothing operation across voxels (Lindquist, 2008; Carp, 2012). Spatial smoothing  
449 and normalization procedures can incorrectly assign signal to voxels and average away meaningful  
450 signal and individual variability in language processing (Steinmetz and Seitz, 1991; Fedorenko and  
451 Kanwisher, 2009; Fedorenko et al., 2012; Huth et al., 2016; Deniz et al., 2019). Thus, brain regions  
452 identified by past studies may be more relevant at the group level than in individual subjects. These  
453 smoothing procedures likely contribute to the inconsistencies observed between past studies and this  
454 study.

455

456 Second, we used an explicit computational model to identify semantically selective voxels. In  
457 contrast, most previous studies identified semantic brain regions by contrasting different experimental  
458 conditions (Binder et al., 2008, 2009; Price, 2012). Although past studies designed their experimental  
459 conditions to isolate brain activity involved in semantic processing (Binder et al., 2008, 2009), there  
460 could be unexpected differences unrelated to semantic processing between the conditions. For  
461 example, experiments that contrast a semantic task with a phonological task (Binder et al., 2008,  
462 2009) may have task difficulty as a confound. As a result, it is possible that some semantic brain  
463 areas identified by past studies are actually involved in processing the unexpected differences rather  
464 than semantics. We would likely not have identified such brain areas in this study, since our semantic  
465 model only contains information about semantics.

466

467 Third, we evaluated semantic model prediction accuracy on a separate, held-out validation dataset. In  
468 contrast, most previous studies drew inferences from analyses performed on only one dataset without

469 a validation dataset (Binder et al., 2009). Performing analyses on only one dataset can lead to  
470 inflated results that are overfit to the dataset (Soch et al., 2016). Thus, some semantic brain areas  
471 identified by past studies may only be relevant for the specific stimuli, experimental design, or data  
472 used in those studies. Such study-specific brain areas would not generalize to other studies, such as  
473 this study.

474

475 Finally, subjects in our study passively read the stimulus words, which allowed us to directly compare  
476 the Narratives condition with the other three conditions. In contrast, many past studies of semantic  
477 processing used active tasks involving lexical decisions (Binder et al., 2003), matching  
478 (Vandenberghe et al., 1996), or monitoring (Démonet et al., 1992). Active tasks are thought to  
479 increase subject engagement, which can increase evoked BOLD SNR. Thus, if we had used an  
480 active task, the effect of context on evoked SNR might have been even larger than the differences  
481 that we report here. In addition, different active tasks can affect semantic processing differently in the  
482 brain (Toneva et al., 2020). Therefore, task effects likely contributed to the inconsistencies observed  
483 between past studies and this study.

484

485 Our study used only one semantic model, and that model determined which specific voxels were  
486 identified as semantically selective. Because this model likely captures some narrative information  
487 that is correlated with word-level semantic information, some of the brain activity predicted by our  
488 semantic model may actually reflect higher-level linguistic or domain-general representations  
489 (Fedorenko et al., 2012; Blank and Fedorenko, 2017). Furthermore, other studies have proposed  
490 alternative models that integrate contextual semantic information differently than the model used here  
491 (Jain and Huth, 2018; Toneva and Wehbe, 2019), and it is possible that these other models might  
492 predict voxel activity better than the semantic model used here. The voxelwise modeling framework  
493 provides a straightforward method for evaluating alternative semantic models directly by construction  
494 of appropriate feature spaces. Therefore, a valuable direction for future research would be to examine

495 other semantic models, and to include language models that explicitly account for factors such as  
496 narrative structure, metaphor, and humor.

497

498 In conclusion, our results show that increasing the amount of stimulus context increases both the  
499 SNR of evoked brain responses and the representation of semantic information in the brain at the  
500 group level. In addition, we find that only natural language stimuli (Narratives) consistently evoke  
501 widespread representation of semantic information across the cortical surface in individual subjects.  
502 These results imply that neuroimaging studies that use isolated words or sentences to study semantic  
503 processing may provide a misleading picture of semantic language comprehension in daily life.  
504 Although natural language stimuli are much more complex than isolated words and sentences, the  
505 development and validation of the voxelwise encoding model framework for language processing  
506 (Huth et al., 2016; de Heer et al., 2017; Deniz et al., 2019; Popham et al., 2021) has made it possible  
507 to rigorously test hypotheses about semantic processing with natural language stimuli. To ensure that  
508 the results of neuroimaging study generalize to natural language processing, we suggest that future  
509 studies of semantic processing should use more naturalistic stimuli.

510

## 511 **References**

- 512 Benjamini Y, Hochberg Y (1995) Controlling the False Discovery Rate: A Practical and Powerful  
513 Approach to Multiple Testing. *J R Stat Soc Series B Stat Methodol* 57:289–300.
- 514 Binder JR, Desai RH, Graves WW, Conant LL (2009) Where Is the Semantic System? A Critical  
515 Review and Meta-Analysis of 120 Functional Neuroimaging Studies. *Cereb Cortex* 19:2767–  
516 2796.
- 517 Binder JR, McKiernan KA, Parsons ME, Westbury CF, Possing ET, Kaufman JN, Buchanan L (2003)  
518 Neural correlates of lexical access during visual word recognition. *J Cogn Neurosci* 15:372–393.
- 519 Binder JR, Swanson SJ, Hammeke TA, Sabsevitz DS (2008) A comparison of five fMRI protocols for  
520 mapping speech comprehension systems. *Epilepsia* 49:1980–1997.
- 521 Blank I, Fedorenko E (2017) Domain-general brain regions do not track linguistic input as closely as  
522 language-selective regions. *J Neurosci*:3642–3616.
- 523 Boersman P, Weenink D (2014) Praat: doing phonetics by computer (Version 5.3. 56). Amsterdam:

- 524 Praat Available at: [https://scholar.google.ca/scholar?](https://scholar.google.ca/scholar?cluster=330790021926508991&hl=en&as_sdt=0,5&scioldt=0,5)  
525 [cluster=330790021926508991&hl=en&as\\_sdt=0,5&scioldt=0,5](https://scholar.google.ca/scholar?cluster=330790021926508991&hl=en&as_sdt=0,5&scioldt=0,5).
- 526 Booth JR, Burman DD, Meyer JR, Gitelman DR, Parrish TB, Mesulam MM (2002) Modality  
527 independence of word comprehension. *Hum Brain Mapp* 16:251–261.
- 528 Breakspear M (2017) Dynamic models of large-scale brain activity. *Nat Neurosci* 20:340–352.
- 529 Bressler DW, Silver MA (2010) Spatial attention improves reliability of fMRI retinotopic mapping  
530 signals in occipital and parietal cortex. *Neuroimage* 53:526–533.
- 531 Buchweitz A, Mason RA, Tomitch LMB, Just MA (2009) Brain activation for reading and listening  
532 comprehension: An fMRI study of modality effects and individual differences in language  
533 comprehension. *Psychol Neurosci* 2:111–123.
- 534 Carp J (2012) The secret lives of experiments: methods reporting in the fMRI literature. *Neuroimage*  
535 63:289–300.
- 536 Constable RT, Pugh KR, Berroya E, Mencl WE, Westerveld M, Ni W, Shankweiler D (2004) Sentence  
537 complexity and input modality effects in sentence comprehension: an fMRI study. *Neuroimage*  
538 22:11–21.
- 539 Çukur T, Nishimoto S, Huth AG, Gallant JL (2013) Attention during natural vision warps semantic  
540 representation across the human brain. *Nat Neurosci* 16:763.
- 541 Dahmen JC, Keating P, Nodal FR, Schulz AL, King AJ (2010) Adaptation to stimulus statistics in the  
542 perception and neural representation of auditory space. *Neuron* 66:937–948.
- 543 Dale AM, Fischl B, Sereno MI (1999) Cortical surface-based analysis. I. Segmentation and surface  
544 reconstruction. *Neuroimage* 9:179–194.
- 545 David SV, Vinje WE, Gallant JL (2004) Natural stimulus statistics alter the receptive field structure of  
546 v1 neurons. *J Neurosci* 24:6991–7006.
- 547 de Heer WA, Huth AG, Griffiths TL, Gallant JL, Theunissen FE (2017) The Hierarchical Cortical  
548 Organization of Human Speech Processing. *J Neurosci* 37:6539–6557.
- 549 Démonet JF, Chollet F, Ramsay S, Cardebat D, Nespoulous JL, Wise R, Rascol A, Frackowiak R  
550 (1992) The anatomy of phonological and semantic processing in normal subjects. *Brain*  
551 115:1753–1768.
- 552 Deniz F, Nunez-Elizalde AO, Huth AG, Gallant JL (2019) The Representation of Semantic Information  
553 Across Human Cerebral Cortex During Listening Versus Reading Is Invariant to Stimulus  
554 Modality. *The Journal of Neuroscience* 39:7722–7736 Available at:  
555 <http://dx.doi.org/10.1523/jneurosci.0675-19.2019>.
- 556 Fedorenko E, Duncan J, Kanwisher N (2012) Language-Selective and Domain-General Regions Lie  
557 Side by Side within Broca’s Area. *Curr Biol* 22:2059–2062.
- 558 Fedorenko E, Kanwisher N (2009) Neuroimaging of language: Why hasn’t a clearer picture emerged?  
559 *Lang Linguist Compass* 3:839–865.
- 560 Forster KI (1970) Visual perception of rapidly presented word sequences of varying complexity.  
561 *Percept Psychophys* 8:215–221.



- 562 Gao JS, Huth AG, Lescroart MD, Gallant JL (2015) Pycortex: an interactive surface visualizer for  
563 fMRI. *Front Neuroinform* 9:23.
- 564 Hagoort P (2019) The neurobiology of language beyond single-word processing. *Science* 366:55–58.
- 565 Hamilton LS, Huth AG (2020) The revolution will not be controlled: natural stimuli in speech  
566 neuroscience. *Lang Cogn Neurosci* 35:573–582.
- 567 Hsu C-T, Clariana R, Schloss B, Li P (2019) Neurocognitive Signatures of Naturalistic Reading of  
568 Scientific Texts: A Fixation-Related fMRI Study. *Sci Rep* 9:1–16.
- 569 Humphries C, Binder JR, Medler DA, Liebenthal E (2007) Time course of semantic processes during  
570 sentence comprehension: an fMRI study. *Neuroimage* 36:924–932.
- 571 Huth AG, de Heer WA, Griffiths TL, Theunissen FE, Gallant JL (2016) Natural speech reveals the  
572 semantic maps that tile human cerebral cortex. *Nature* 532:453–458.
- 573 Huth AG, Nishimoto S, Vu AT, Gallant JL (2012) A Continuous Semantic Space Describes the  
574 Representation of Thousands of Object and Action Categories across the Human Brain. *Neuron*  
575 76:1210–1224.
- 576 Jain S, Huth AG (2018) Incorporating Context into Language Encoding Models for fMRI.  
577 bioRxiv:327601 Available at: <https://www.biorxiv.org/content/10.1101/327601v2>.
- 578 Jenkinson M, Bannister P, Brady M, Smith S (2002) Improved optimization for the robust and  
579 accurate linear registration and motion correction of brain images. *Neuroimage* 17:825–841.
- 580 Jenkinson M, Smith S (2001) A global optimisation method for robust affine registration of brain  
581 images. *Med Image Anal* 5:143–156.
- 582 Jobard G, Vigneau M, Mazoyer B, Tzourio-Mazoyer N (2007) Impact of modality and linguistic  
583 complexity during reading and listening tasks. *Neuroimage* 34:784–800.
- 584 Jones E, Oliphant T, Peterson P (2001) SciPy: Open Source Scientific Tools for Python. Available at:  
585 <https://www.semanticscholar.org/paper/307827ec09187e9c6935e8ff5fd43eeefb901320>.
- 586 Just MA, Wang J, Cherkassky VL (2017) Neural representations of the concepts in simple sentences:  
587 Concept activation prediction and context effects. *Neuroimage* 157:511–520.
- 588 Kluyver T, Ragan-Kelley B, Pérez F, Granger B, Bussonnier M, Frederic J, Kelley K, Hamrick JB,  
589 Grout J, Corlay S, Ivanov P, Avila D, Abdalla S, Willing C, Jupyter Development Team (2016)  
590 Jupyter Notebooks - a publishing format for reproducible computational workflows. *ELPUB*  
591 Available at:  
592 <https://www.semanticscholar.org/paper/e47868841d87efe261451a43b00d6c81cf7fb7a3>.
- 593 Lerner Y, Honey CJ, Silbert LJ, Hasson U (2011) Topographic mapping of a hierarchy of temporal  
594 receptive windows using a narrated story. *J Neurosci* 31:2906–2915.
- 595 Lindquist MA (2008) The Statistical Analysis of fMRI Data. *Stat Sci* 23:439–464.
- 596 Mazoyer BM, Tzourio N, Frak V, Syrota A, Murayama N, Levrier O, Salamon G, Dehaene S, Cohen  
597 L, Mehler J (1993) The Cortical Representation of Speech. *J Cogn Neurosci* 5:467–479.
- 598 Mollica F, Siegelman M, Diachek E, Piantadosi ST, Mineroff Z, Futrell R, Kean H, Qian P, Fedorenko

- 599 E (2020) Composition is the Core Driver of the Language-selective Network. *Neurobiology of*  
600 *Language* 1:104–134.
- 601 Nastase SA, Connolly AC, Oosterhof NN, Halchenko YO, Guntupalli JS, Visconti di Oleggio Castello  
602 M, Gors J, Gobbini MI, Haxby JV (2017) Attention Selectively Reshapes the Geometry of  
603 Distributed Semantic Representation. *Cereb Cortex* 27:4277–4291.
- 604 Nishimoto S, Vu AT, Naselaris T, Benjamini Y, Yu B, Gallant JL (2011) Reconstructing visual  
605 experiences from brain activity evoked by natural movies. *Curr Biol* 21:1641–1646.
- 606 Nunez-Elizalde AO, Huth AG, Gallant JL (2019) Voxelwise encoding models with non-spherical  
607 multivariate normal priors. *Neuroimage* 197:482–492.
- 608 Oliphant TE (2006) A guide to NumPy.
- 609 Pereira F, Lou B, Pritchett B, Ritter S, Gershman SJ, Kanwisher N, Botvinick M, Fedorenko E (2018)  
610 Toward a universal decoder of linguistic meaning from brain activation. *Nat Commun* 9:1–13.
- 611 Perez F, Granger BE (2007) IPython: A System for Interactive Scientific Computing. *Computing in*  
612 *Science and Engg* 9:21–29.
- 613 Poeppel D, Emmorey K, Hickok G, Pylkkänen L (2012) Towards a new neurobiology of language. *J*  
614 *Neurosci* 32:14125–14131.
- 615 Popham SF, Huth AG, Bilenko NY, Deniz F, Gao JS, Nunez-Elizalde AO, Gallant JL (2021) Visual  
616 and linguistic semantic representations are aligned at the border of human visual cortex. *Nat*  
617 *Neurosci* 24:1628–1636.
- 618 Price CJ (2010) The anatomy of language: a review of 100 fMRI studies published in 2009. *Ann N Y*  
619 *Acad Sci* 1191:62–88.
- 620 Price CJ (2012) A review and synthesis of the first 20years of PET and fMRI studies of heard speech,  
621 spoken language and reading. *Neuroimage* 62:816–847.
- 622 Ringach DL, Hawken MJ, Shapley R (2002) Receptive field structure of neurons in monkey primary  
623 visual cortex revealed by stimulation with natural image sequences. *J Vis* 2:12–24.
- 624 Rodd JM, Davis MH, Johnsrude IS (2005) The neural mechanisms of speech comprehension: fMRI  
625 studies of semantic ambiguity. *Cereb Cortex* 15:1261–1269.
- 626 Simoncelli EP, Olshausen BA (2001) Natural image statistics and neural representation. *Annu Rev*  
627 *Neurosci* 24:1193–1216.
- 628 Soch J, Haynes J-D, Allefeld C (2016) How to avoid mismodelling in GLM-based fMRI data analysis:  
629 cross-validated Bayesian model selection. *Neuroimage* 141:469–489.
- 630 Sprague TC, Saproo S, Serences JT (2015) Visual attention mitigates information loss in small- and  
631 large-scale neural codes. *Trends Cogn Sci* 19:215–226.
- 632 Steinmetz H, Seitz RJ (1991) Functional anatomy of language processing: neuroimaging and the  
633 problem of individual variability. *Neuropsychologia* 29:1149–1161.
- 634 Toneva M, Stretcu O, Póczos B, Wehbe L, Mitchell TM (2020) Modeling Task Effects on Meaning  
635 Representation in the Brain via Zero-Shot MEG Prediction. In: *Advances in Neural Information*



- 636 Processing Systems.
- 637 Toneva M, Wehbe L (2019) Interpreting and improving natural-language processing (in machines)  
638 with natural language-processing (in the brain). In: *Advances in Neural Information Processing*  
639 *Systems*, pp 14928–14938.
- 640 Touryan J, Felsen G, Dan Y (2005) Spatial structure of complex cell receptive fields measured with  
641 natural images. *Neuron* 45:781–791.
- 642 Vandenberghe R, Price C, Wise R, Josephs O, Frackowiak RSJ (1996) Functional anatomy of a  
643 common semantic system for words and pictures. *Nature* 383:254–256.
- 644 Wehbe L, Murphy B, Talukdar P, Fyshe A, Ramdas A, Mitchell T (2014) Simultaneously Uncovering  
645 the Patterns of Brain Regions Involved in Different Story Reading Subprocesses Paterson K, ed.  
646 *PLoS One* 9:e112575.
- 647 Wu MC-K, David SV, Gallant JL (2006) Complete functional characterization of sensory neurons by  
648 system identification. *Annu Rev Neurosci* 29:477–505.
- 649 Xu J, Kemeny S, Park G, Frattali C, Braun A (2005) Language in context: emergent features of word,  
650 sentence, and narrative comprehension. *Neuroimage* 25:1002–1015.
- 651 Yuan J, Liberman M (2008) Speaker identification on the SCOTUS corpus. *Proceedings of Acoustics*.

652 **Figures and Figure legends**

653

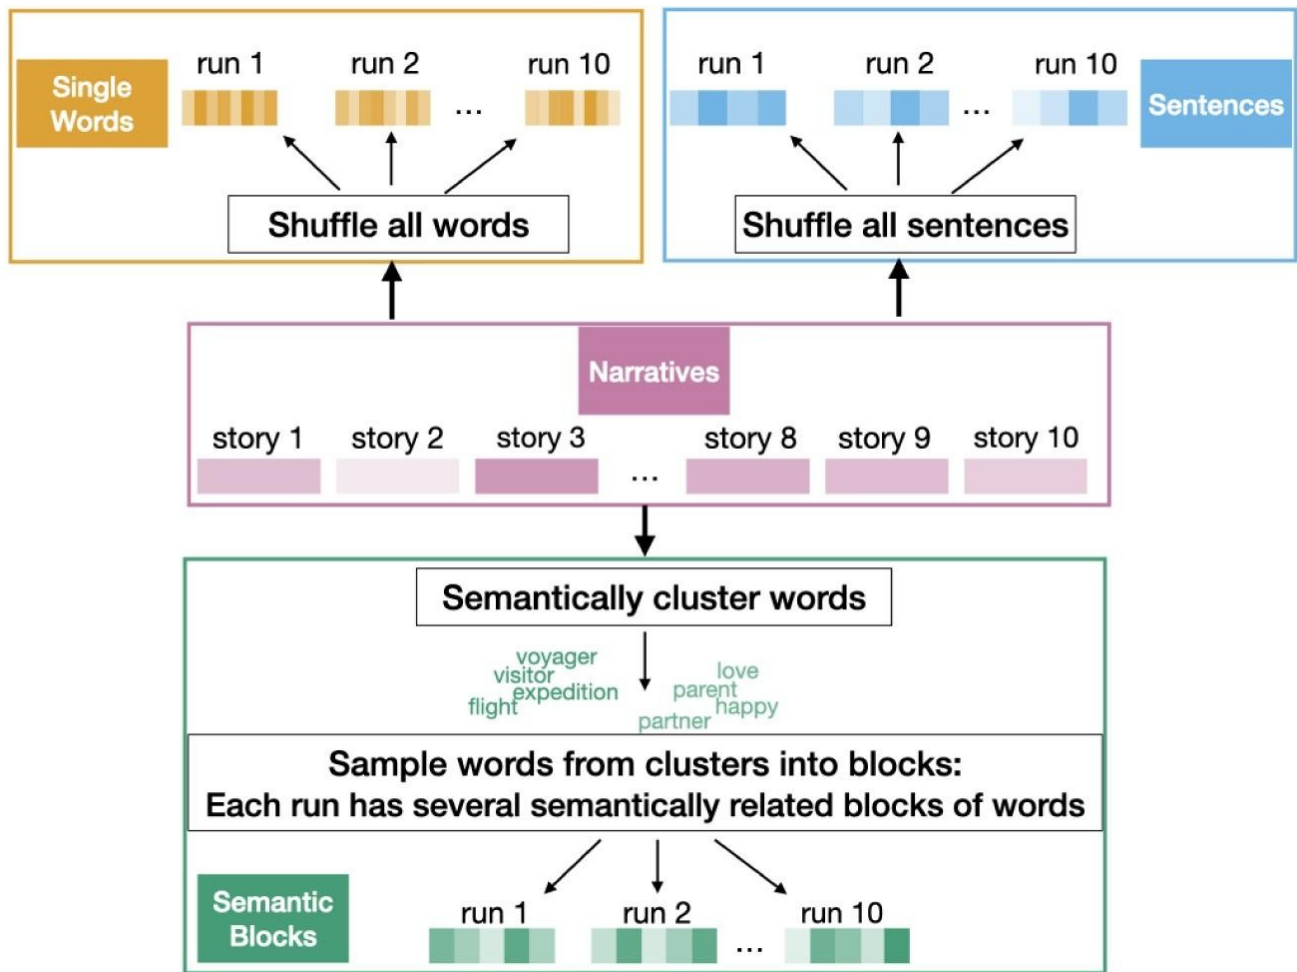

654

655

656 **Figure 1: Stimulus conditions.** The experiment contained four stimulus conditions that were based  
657 on the ten narratives used in Huth et al. (2016). The Single Words condition consisted of words  
658 sampled randomly from the ten narratives. The Semantic Blocks condition consisted of blocks of  
659 words sampled from clusters of semantically similar words from the ten narratives. There were 12  
660 distinct clusters of semantically similar words, and blocks of words were created by randomly  
661 sampling 114 words from one word cluster for each block. The Sentences condition consisted of  
662 sentences sampled randomly from the ten narratives. Finally, the Narratives condition consisted of  
663 the ten original narratives.

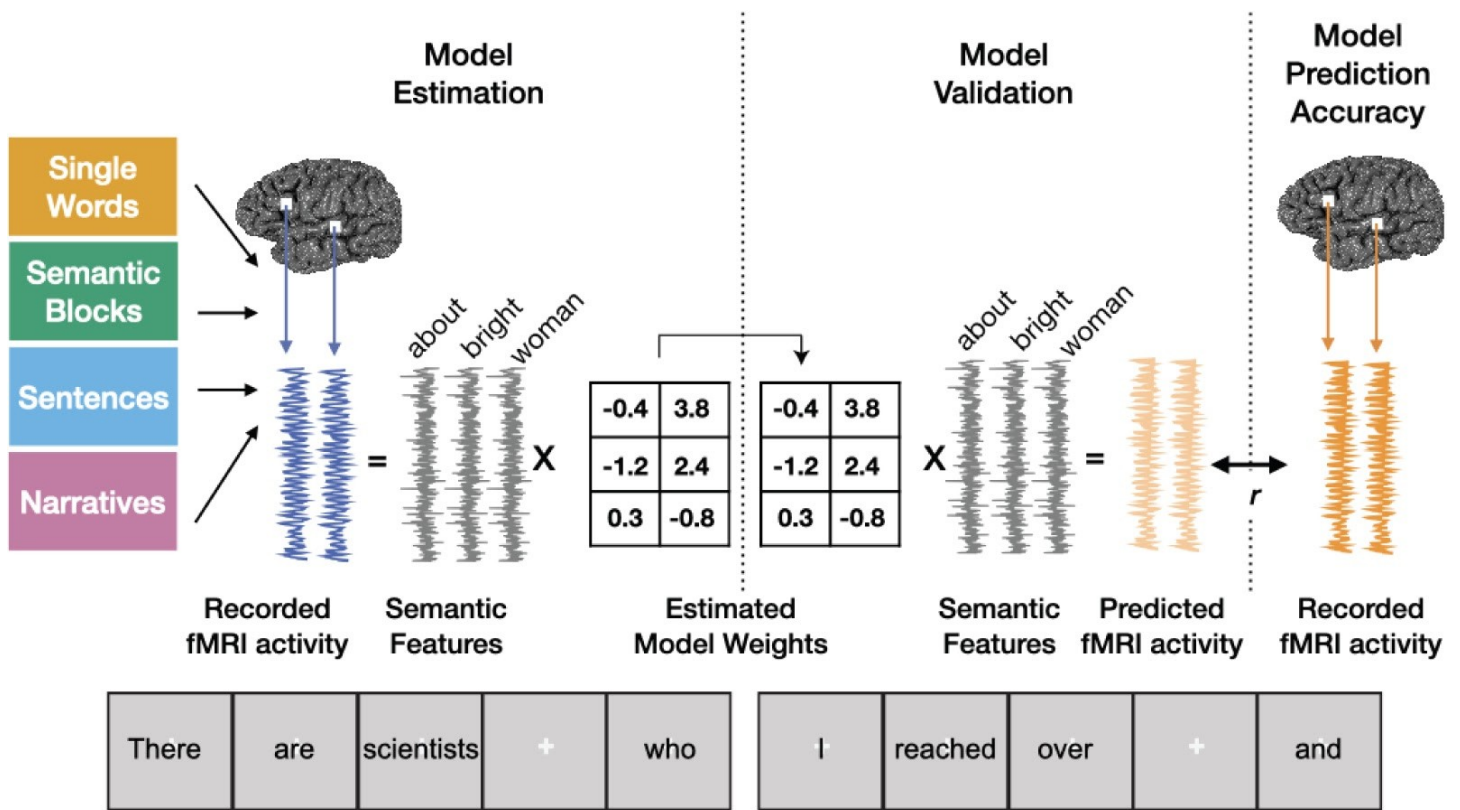

664

665 **Figure 2: Voxelwise Modeling.** Four subjects read words from the four stimulus conditions while  
 666 BOLD responses were recorded. Each stimulus word was projected into a 985-dimensional word  
 667 embedding space that was independently constructed using word co-occurrence statistics from a  
 668 large corpus (Semantic Features). A finite impulse response (FIR) regularized regression model was  
 669 estimated separately for each voxel in every subject and condition using banded ridge regression  
 670 (Nunez-Elizalde et al. 2019). The estimated model weights were then used to predict BOLD  
 671 responses to a separate, held-out validation stimulus. Model prediction accuracy was quantified as  
 672 the correlation ( $r$ ) between the predicted and recorded BOLD responses to the validation stimulus.

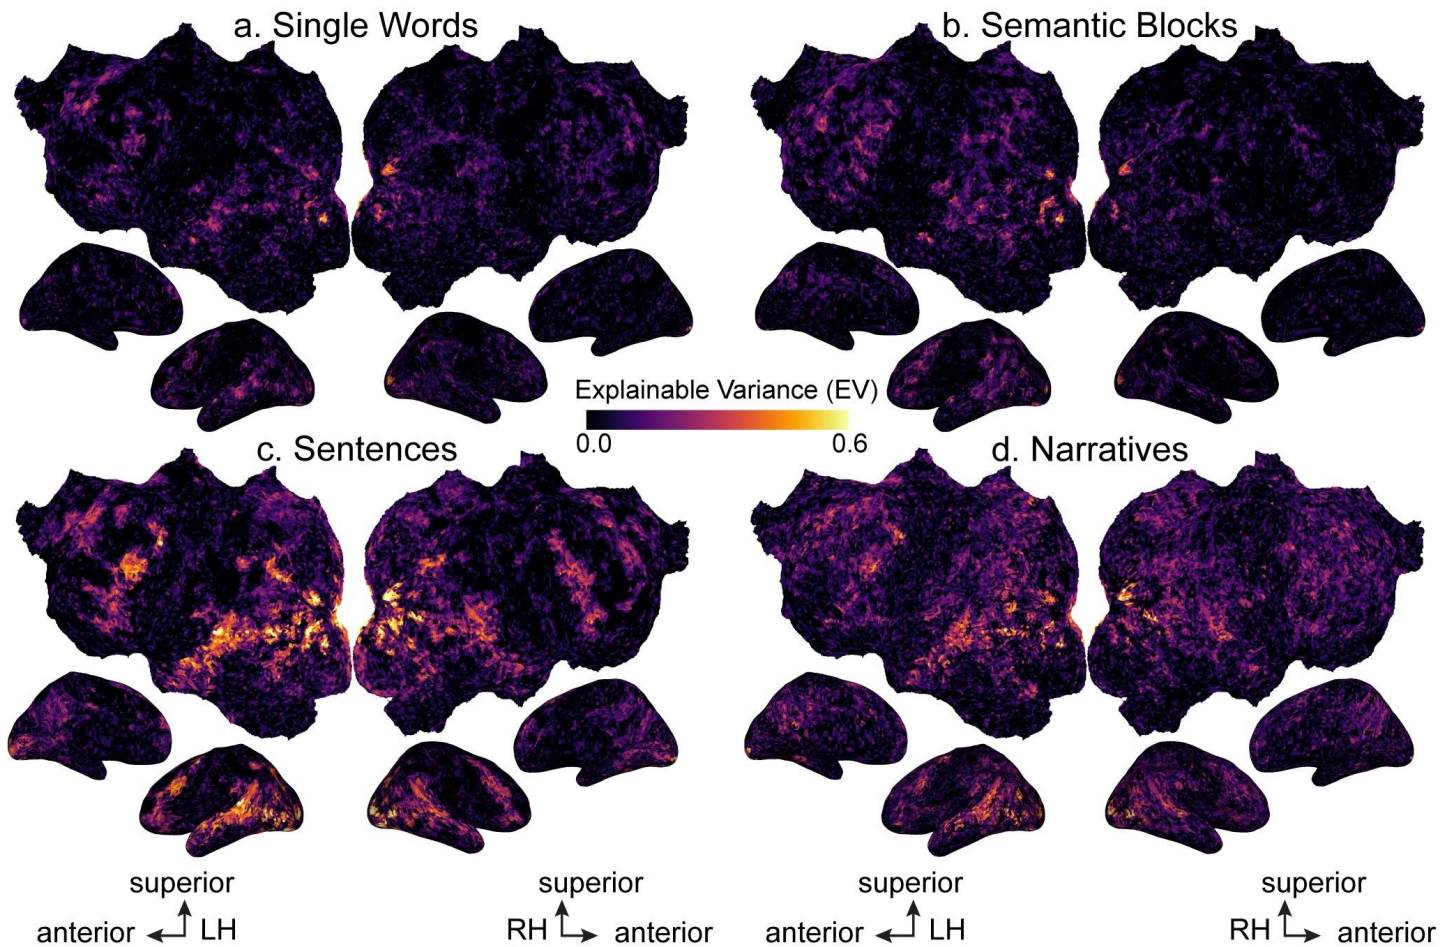

675 **Figure 3. Explainable variance (EV) for the four conditions across the cortical surface.** EV for  
676 the four conditions is shown for one subject (S1) on the subject's flattened cortical surface. EV was  
677 computed as an estimate of the evoked signal-to-noise ratio (SNR). Here EV is given by the color  
678 scale shown in the middle, and voxels that have high EV (i.e., high evoked SNR) appear yellow. (LH:  
679 Left Hemisphere, RH: Right Hemisphere) The format is the same in all panels. **a.** EV was computed  
680 for the Single Words condition and is shown on the flattened cortical surface of subject S1. Scattered  
681 voxels in bilateral primary visual cortex, superior temporal sulcus (STS), and inferior frontal gyrus  
682 (IFG) have high EV. **b.** EV was computed for the Semantic Blocks condition. Similar to the Single  
683 Words condition, scattered voxels in bilateral primary visual cortex, STS, and IFG have high EV. **c.**  
684 EV was computed for the Sentences condition. Many voxels in bilateral visual, parietal, temporal, and  
685 prefrontal cortices have high EV. **d.** EV was computed for the Narratives condition. Similar to the  
686 Sentences condition, voxels in bilateral visual, parietal, temporal, and prefrontal cortices have high  
687 EV. Together, these results show that increasing context increases evoked SNR in bilateral visual,

688 temporal, parietal, and prefrontal cortices. (See Extended Data Figure 3-1 for significant EV voxels for  
689 subject S1 and Extended Data Figure 3-2 for EV for all subjects.)



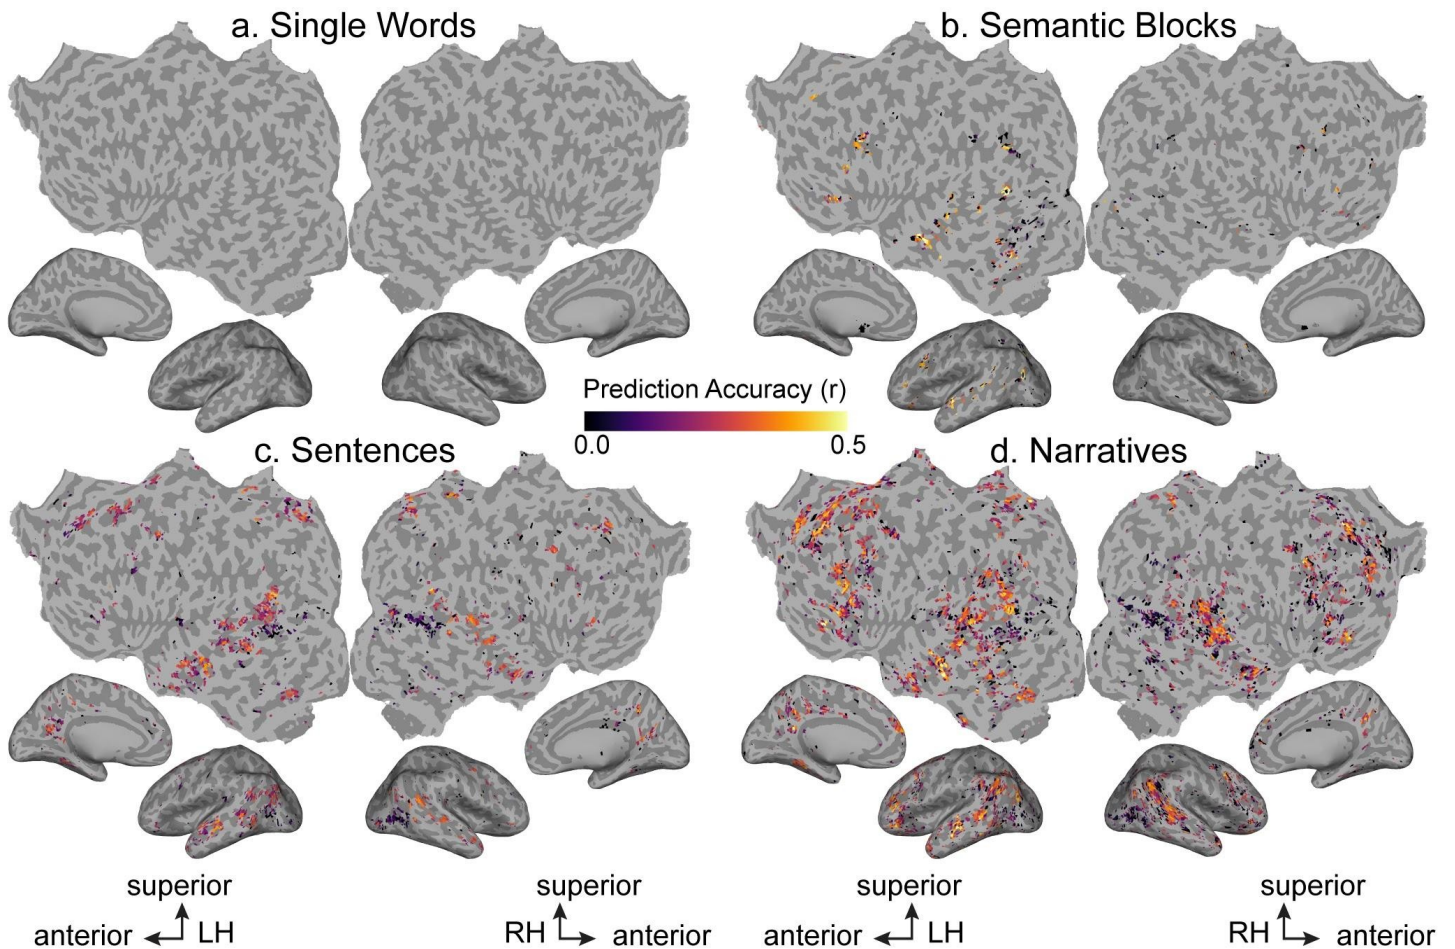

690

691

692

693

694

695

696

697

698

699

700

701

702

703

**Figure 4. Semantic model prediction accuracy for the four conditions across the cortical surface.** Semantic model prediction accuracy in the four conditions is shown on the flattened cortical surface of one subject (S1; see Extended Data Figure 4-1 and 4-2 for all subjects). Voxelwise modeling was first used to estimate semantic model weights in the four conditions. Semantic model prediction accuracy was then computed as the correlation ( $r$ ) between the subject's recorded BOLD activity to the held-out validation stimulus and the BOLD activity predicted by the semantic model. In each panel, only voxels with significant semantic model prediction accuracy ( $p < 0.05$ , FDR corrected) are shown. Prediction accuracy is given by the color scale in the middle, and voxels that have a high prediction accuracy appear yellow. Voxels for which the semantic model prediction accuracy is not statistically significant are shown in gray. (LH: Left Hemisphere, RH: Right Hemisphere) **a.** Semantic model prediction accuracy was computed for the Single Words condition. No voxels are significantly predicted in the Single Words condition. **b.** Semantic model prediction accuracy was computed for the Semantic Blocks condition. The format is the same as panel **a.** Voxels in left STS and IFG are

704 significantly predicted. **c.** Semantic model prediction accuracy was computed for the Sentences  
705 condition. The format is the same as panel **a.** Voxels in left angular gyrus, left STG, bilateral STS,  
706 bilateral ventral precuneus, bilateral ventral premotor speech area (sPMv), bilateral superior frontal  
707 sulcus (SFS), and left superior frontal gyrus (SFG) are significantly predicted. **d.** Semantic model  
708 prediction accuracy was computed for the Narratives condition. The format is the same as panel **a.**  
709 Voxels in bilateral angular gyrus, bilateral STS, bilateral STG, bilateral temporal parietal junction  
710 (TPJ), bilateral sPMv, bilateral ventral precuneus, bilateral SFS, bilateral SFG, bilateral IFG, left  
711 inferior parietal lobule (IPL), and left posterior cingulate gyrus are significantly predicted. Together,  
712 these results suggest that increasing context increases the representation of semantic information in  
713 bilateral temporal, parietal, and prefrontal cortices.

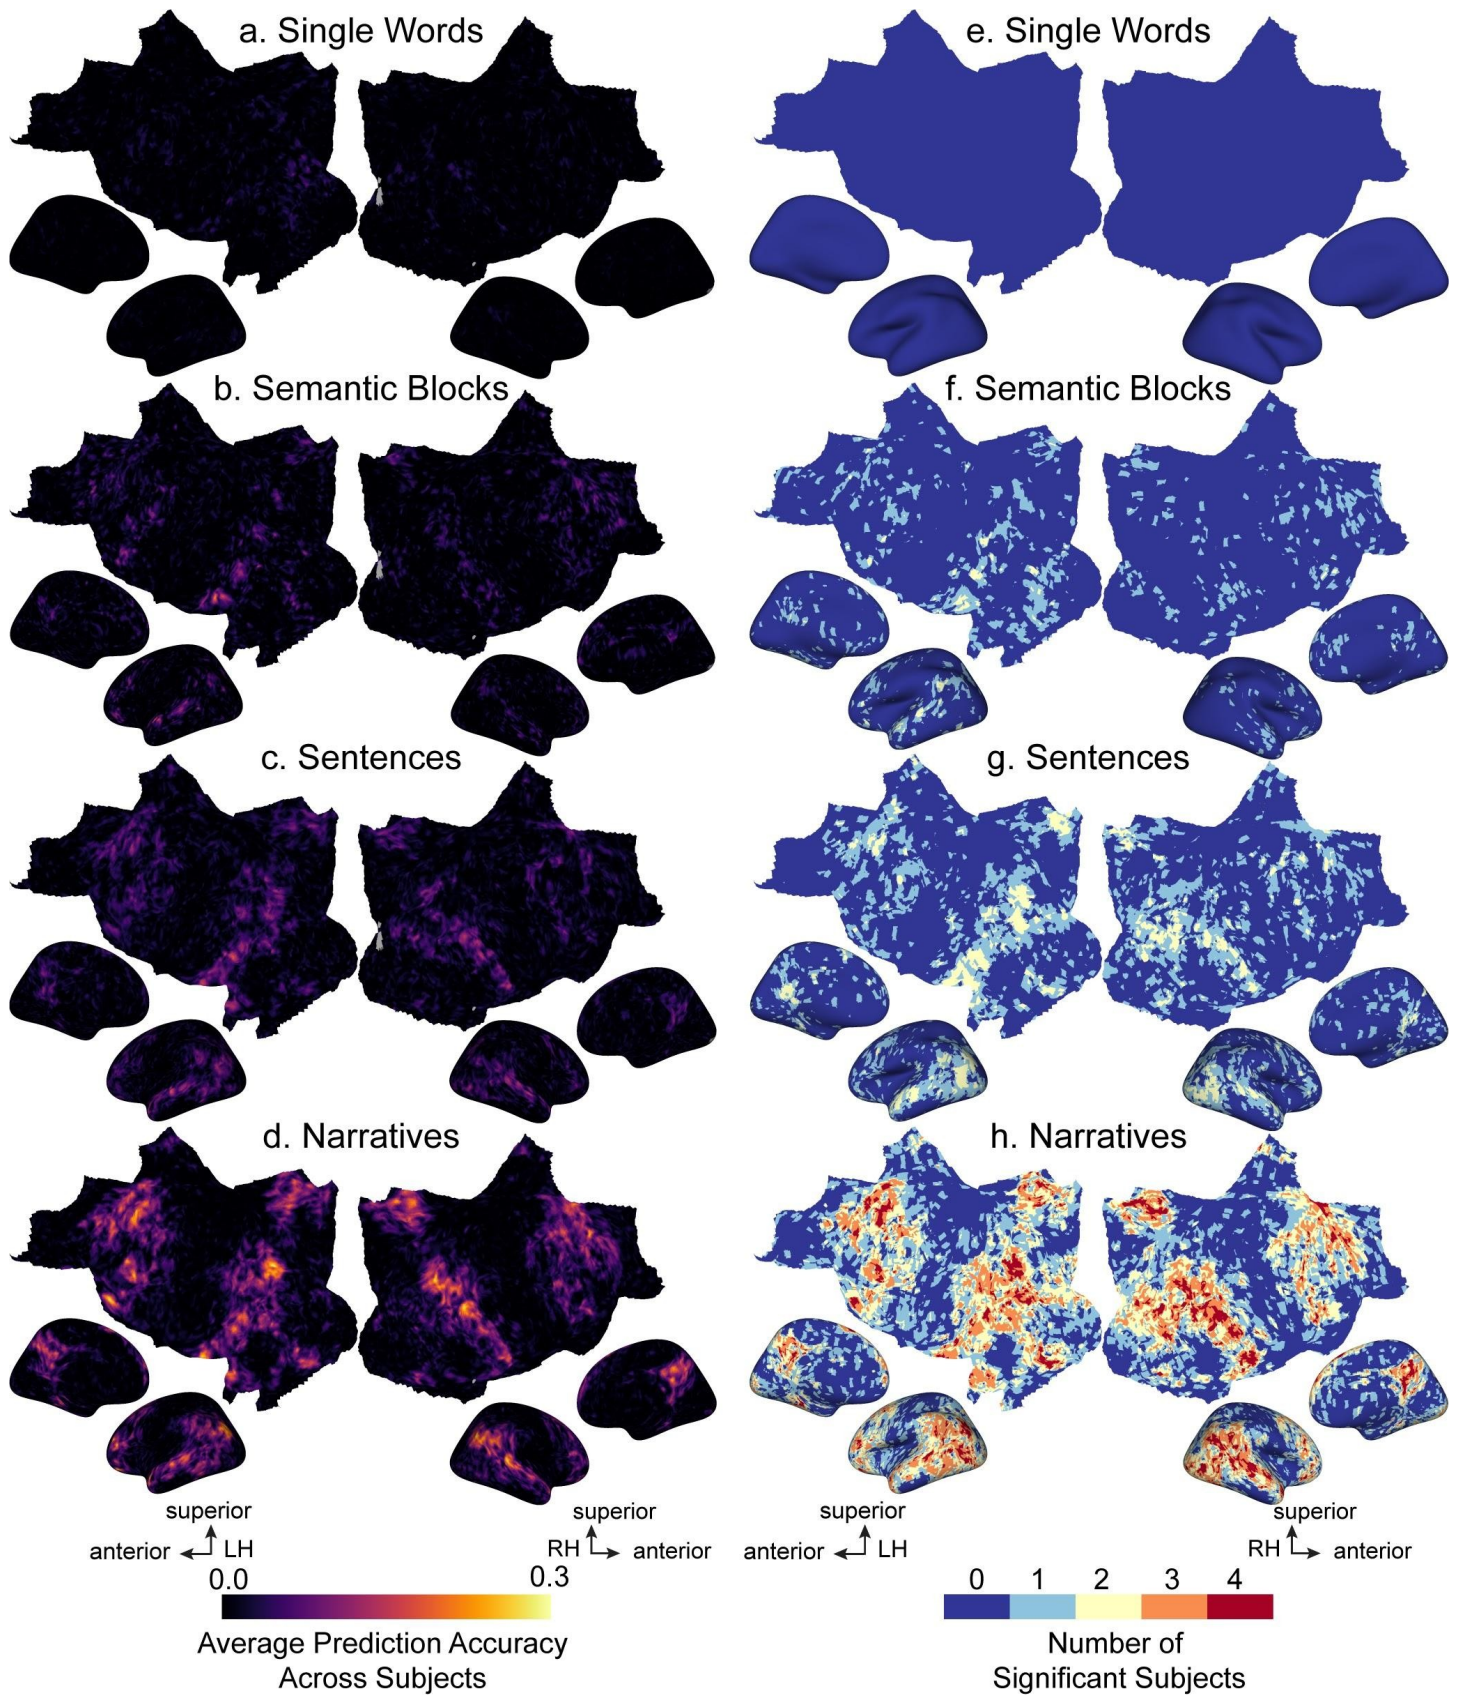

714

715 **Figure 5. Semantic model prediction accuracy across all subjects for the four conditions in**

716 **standard brain space.** Semantic model prediction accuracy was first computed for each subject and

717 for each condition as described in **Figure 4.** These individualized predictions were then projected into



718 the standard MNI brain space. **a.-d.** Average prediction accuracy across the four subjects is  
719 computed for each MNI voxel and shown for each condition on the cortical surface of the MNI brain.  
720 Average prediction accuracy is given by the color scale, and voxels with higher prediction accuracy  
721 appear brighter. **a.** In the Single Words condition, average prediction accuracy is low across the  
722 cortical surface. **b.** In the Semantic Blocks condition, average prediction accuracy is high in voxels in  
723 left anterior STS. **c.** In the Sentences condition, average prediction accuracy is high in bilateral STS,  
724 STG, anterior temporal lobe, angular gyrus, ventral precuneus, SFS, and SFG. **d.** In the Narratives  
725 condition, average prediction accuracy is very high in bilateral STS, STG, MTG, anterior temporal  
726 lobe, angular gyrus, IPL, ventral precuneus, posterior cingulate gyrus, Broca's area, IFG, SFS, SFG,  
727 and left posterior inferior temporal sulcus. **e.-h.** For each condition, statistical significance of  
728 prediction accuracies was determined in each subject's native brain space and then projected into the  
729 MNI brain space. The number of subjects with significant prediction accuracy is shown for each voxel  
730 on the cortical surface of the MNI brain. The number of significant subjects is given by the color scale  
731 shown at bottom. Dark red voxels are significantly predicted in all subjects, and dark blue voxels are  
732 not significantly predicted in any subjects. **e.** In the Single Words condition, no voxels are  
733 semantically selective for any subjects. **f.** In the Semantic Blocks condition, scattered voxels in left  
734 STS are semantically selective in two out of four subjects. **g.** In the Sentences condition, voxels in the  
735 bilateral STS, STG, angular gyrus, ventral precuneus, and SFS are semantically selective in two out  
736 of four subjects. **h.** In the Narratives condition, voxels in bilateral angular gyrus, bilateral STS, anterior  
737 temporal lobe, SFS, SFG, IFG, ventral precuneus, posterior cingulate gyrus, and right STG are  
738 semantically selective in all four subjects. The results shown here are consistent with those in **Figure**  
739 **4**, and they suggest that increasing context increases the representation of semantic information  
740 across the cortical surface at the group level but not for individual subjects.

741 **Extended Data Figure legends**

742

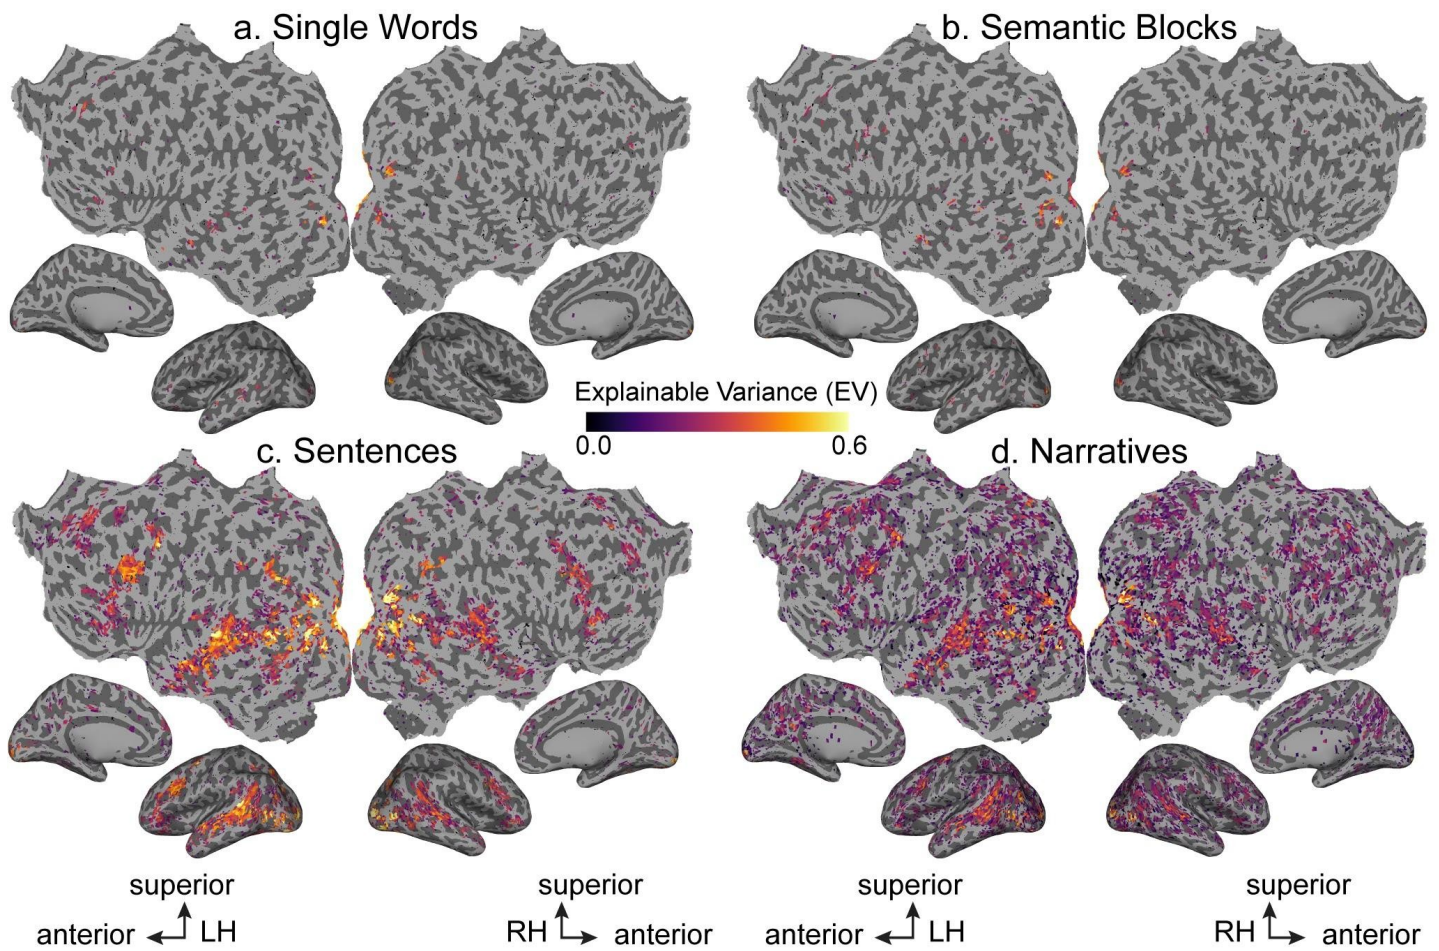

743

744 **Figure 3-1. Significant explainable variance (EV) for the four conditions across the cortical**

745 **surface.** EV is shown for the four conditions on the flattened cortical surface of one subject (S1). EV

746 was computed as an estimate of the evoked signal-to-noise ratio (SNR). Only voxels with significant

747 EV ( $p < 0.05$ , FDR corrected) are shown. EV is given by the color scale shown in the middle, and

748 voxels that have high EV appear yellow. Voxels with EV values that are not statistically significant are

749 shown in gray. (LH: Left Hemisphere, RH: Right Hemisphere) **a.** EV was computed for the Single

750 Words condition, and significant voxels are shown on the flattened cortical surface of subject S1.

751 Scattered voxels in bilateral primary visual cortex, left STS, and left IFG have significant EV. **b.** Same

752 as panel **a.** but for the Semantic Blocks condition. Similar to the Single Words condition, scattered

753 voxels in bilateral primary visual cortex, left STS, and left IFG have significant EV. **c.** Same as panel

754 **a.** but for the Sentences condition. Many voxels in bilateral visual, parietal, temporal, and prefrontal

755 cortices have significant EV. **d.** Same as panel **a.** but for the Narratives condition. Similar to the  
756 Sentences condition, voxels in bilateral visual, parietal, temporal, and prefrontal cortices have high  
757 EV.



a. Subject S2

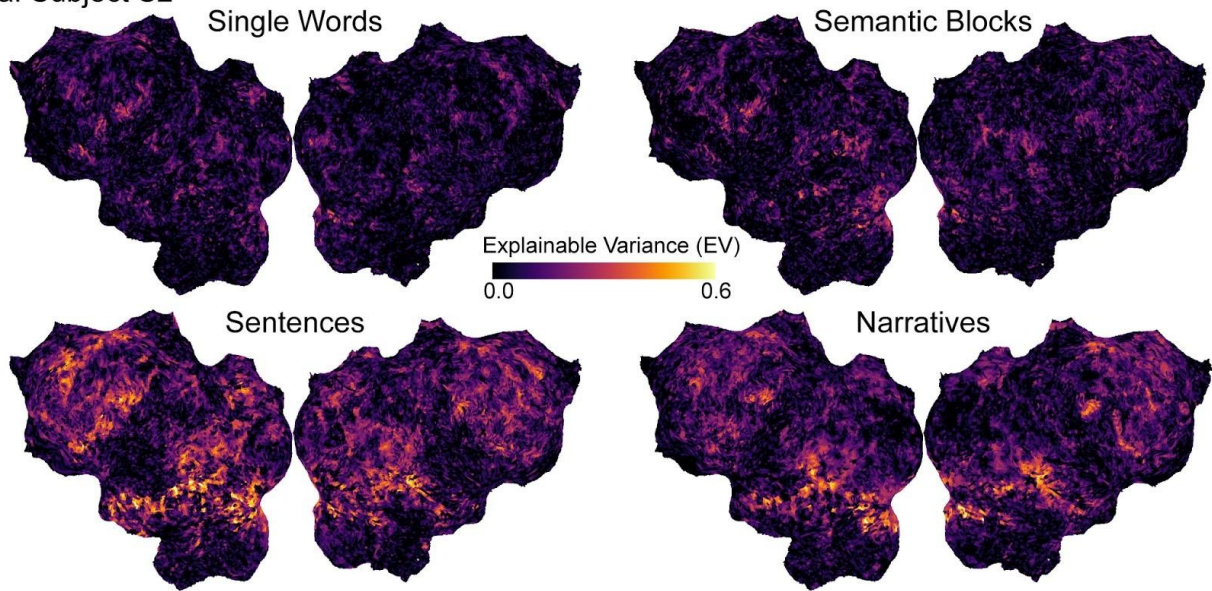

b. Subject S3

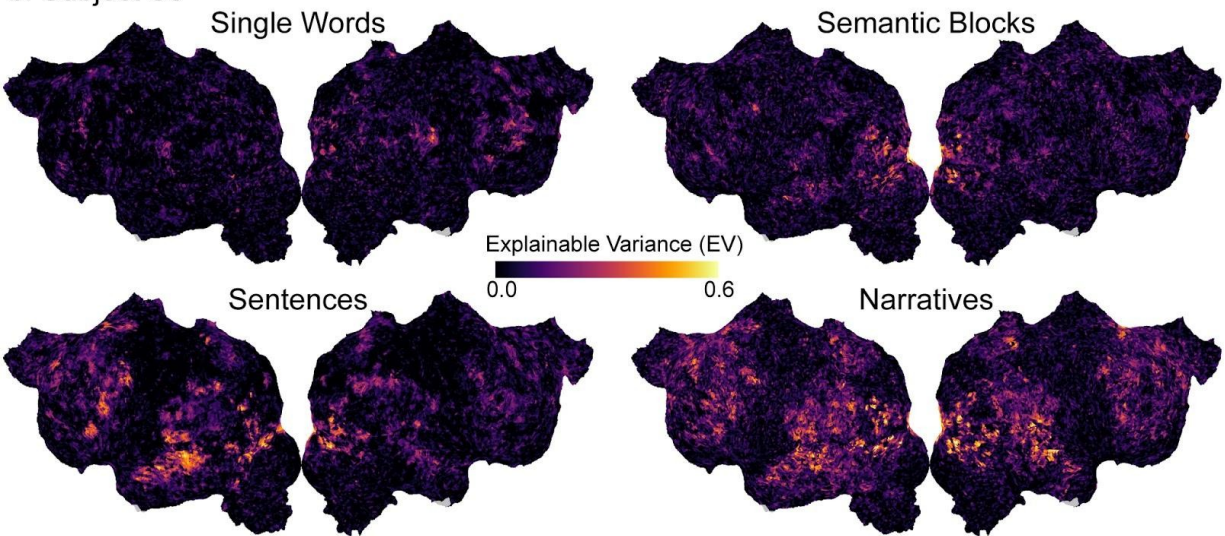

c. Subject S4

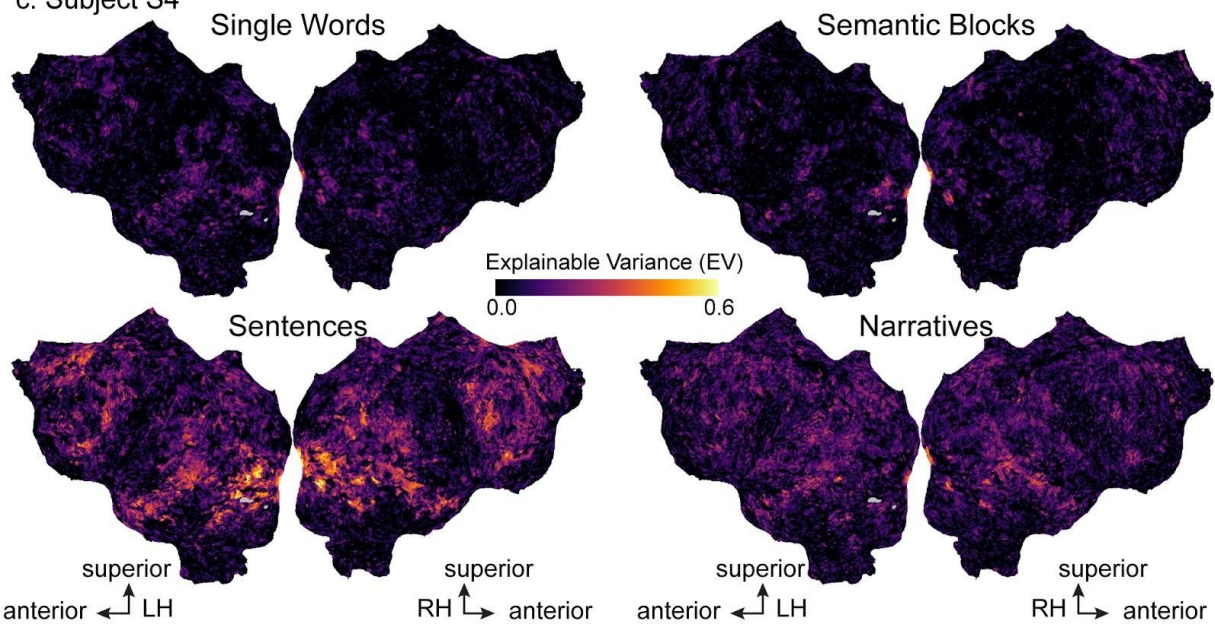

759 **Figure 3-2. Explainable variance (EV) for the four conditions across the cortical surface for**  
760 **subjects S2, S3, and S4.** EV is shown for the four conditions on the flattened cortical surface of  
761 subjects S2, S3 and S4. The format is the same as **Figure 3.** EV was computed as an estimate of the  
762 evoked signal-to-noise ratio (SNR). EV is given by the color scale shown in the middle, and voxels  
763 that have high EV (i.e., high evoked SNR) appear yellow. (LH: Left Hemisphere, RH: Right  
764 Hemisphere) Across all subjects, EV is low across most of the cortical surface in the Single Words  
765 and Semantic Blocks conditions. In contrast, EV is high for many voxels in bilateral visual, parietal,  
766 temporal, and prefrontal cortices in the Sentences and Narratives conditions.



a. Subject S2

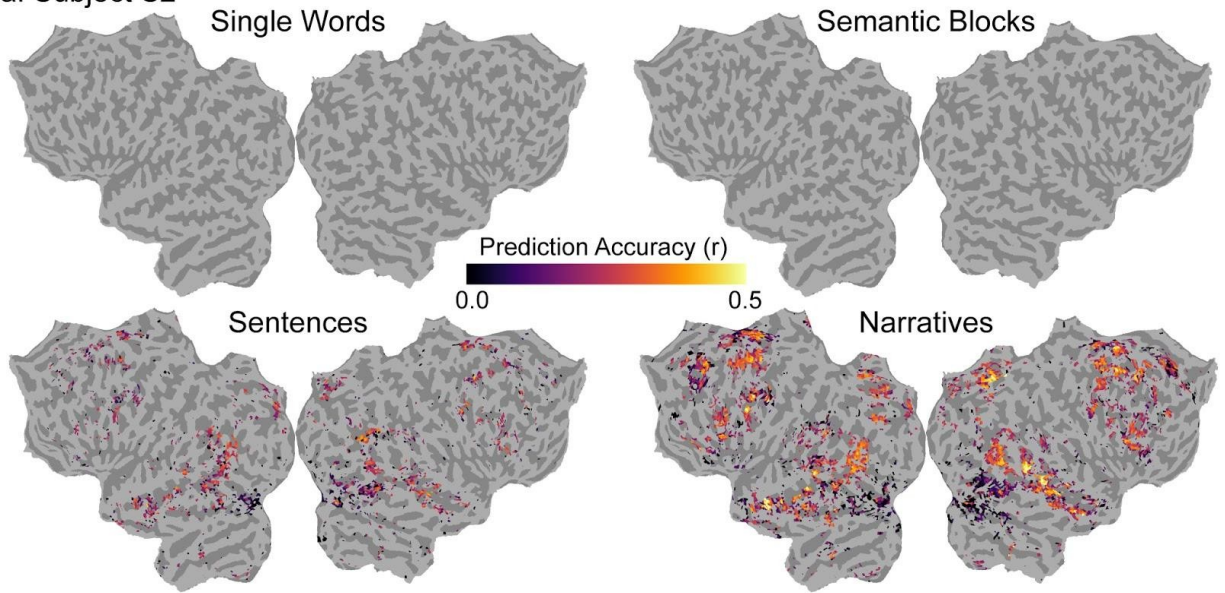

b. Subject S3

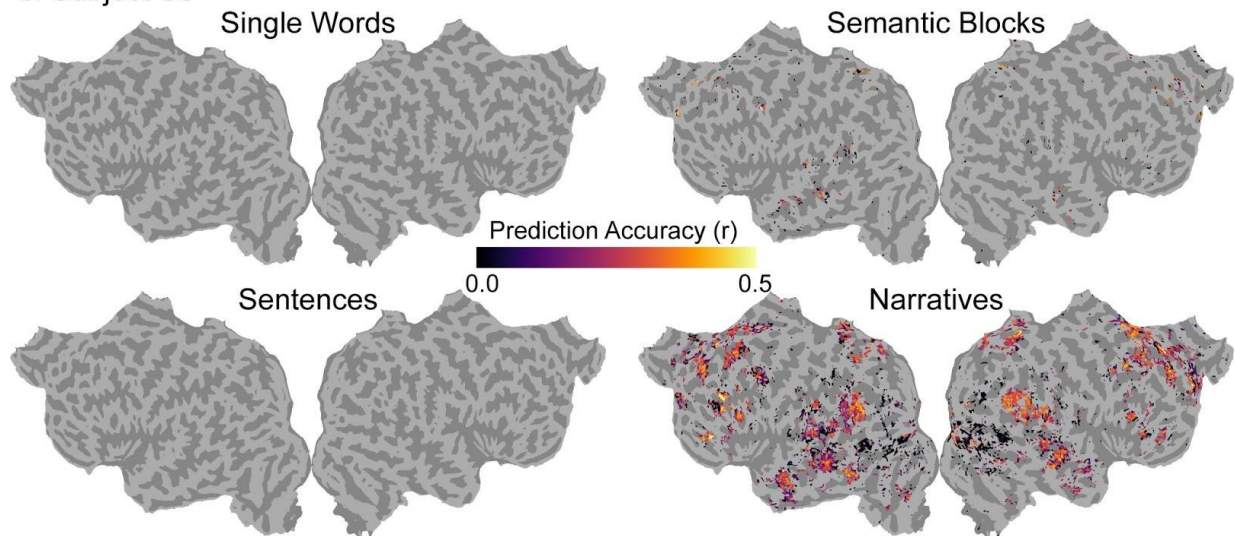

c. Subject S4

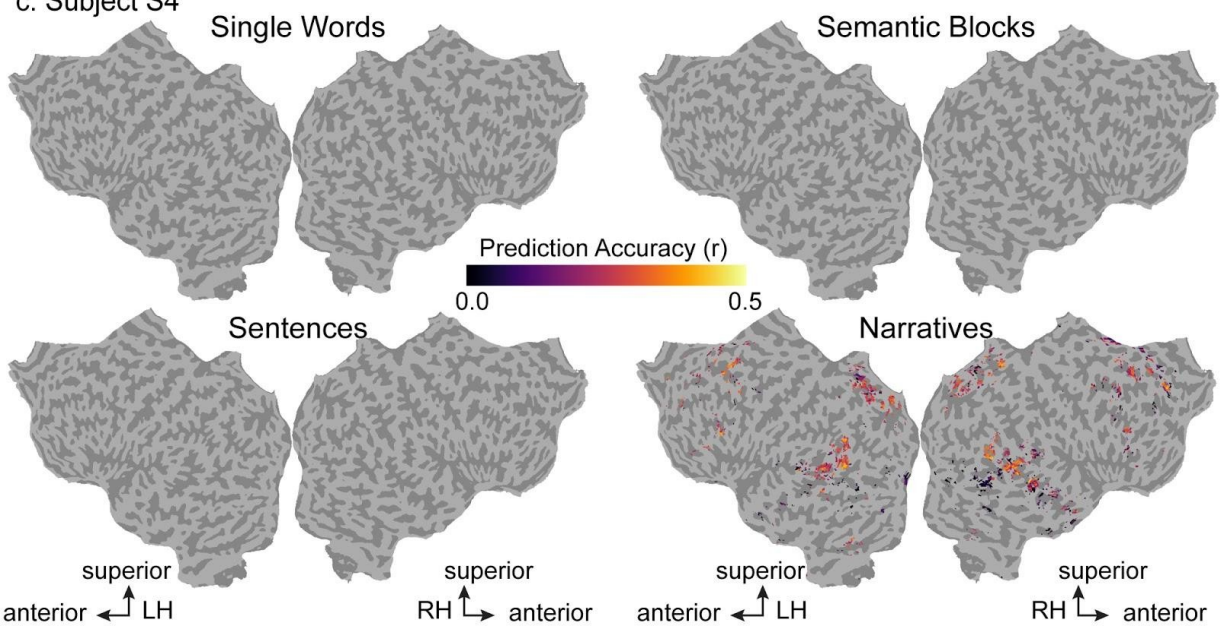

768 **Figure 4-1. Semantic model prediction accuracy for the four conditions across the cortical**  
769 **surface for subjects S2, S3, and S4.** Semantic model prediction accuracy in the four conditions is  
770 shown on the flattened cortical surface of subjects S2, S3 and S4. The format is the same as **Figure**  
771 **4.** Voxelwise modeling was first used to estimate semantic model weights in the four conditions.  
772 Semantic model prediction accuracy was then computed as the correlation ( $r$ ) between the subject's  
773 recorded BOLD activity to the held-out validation story and the BOLD activity predicted by the  
774 semantic model. In each panel, only voxels with significant semantic model prediction accuracy  
775 ( $p < 0.05$ , FDR corrected) are shown. Prediction accuracy is given by the color scale in the middle, and  
776 voxels that have a high prediction accuracy appear yellow. Voxels with semantic model prediction  
777 accuracies that are not statistically significant are shown in gray. (LH: Left Hemisphere, RH: Right  
778 Hemisphere) In the Single Words condition, no voxels are significantly predicted in all subjects. In the  
779 Semantic Blocks condition, scattered voxels in left STS, left angular gyrus, left sPMv, and bilateral  
780 SFS are significantly predicted in subject S3. In the Sentences condition, voxels in bilateral STS,  
781 bilateral STG, bilateral angular gyrus, bilateral ventral precuneus, bilateral SFS and SFG, bilateral  
782 IFG, and bilateral sPMv are significantly predicted in subject S2. In the Narratives condition, voxels in  
783 bilateral angular gyrus, bilateral ventral precuneus, bilateral SFS and SFG, and right STS are  
784 significantly predicted in all three subjects. In addition, bilateral STG, left STS, bilateral Broca's area  
785 and IFG, and bilateral sPMv are significantly predicted in subjects S2 and S3.



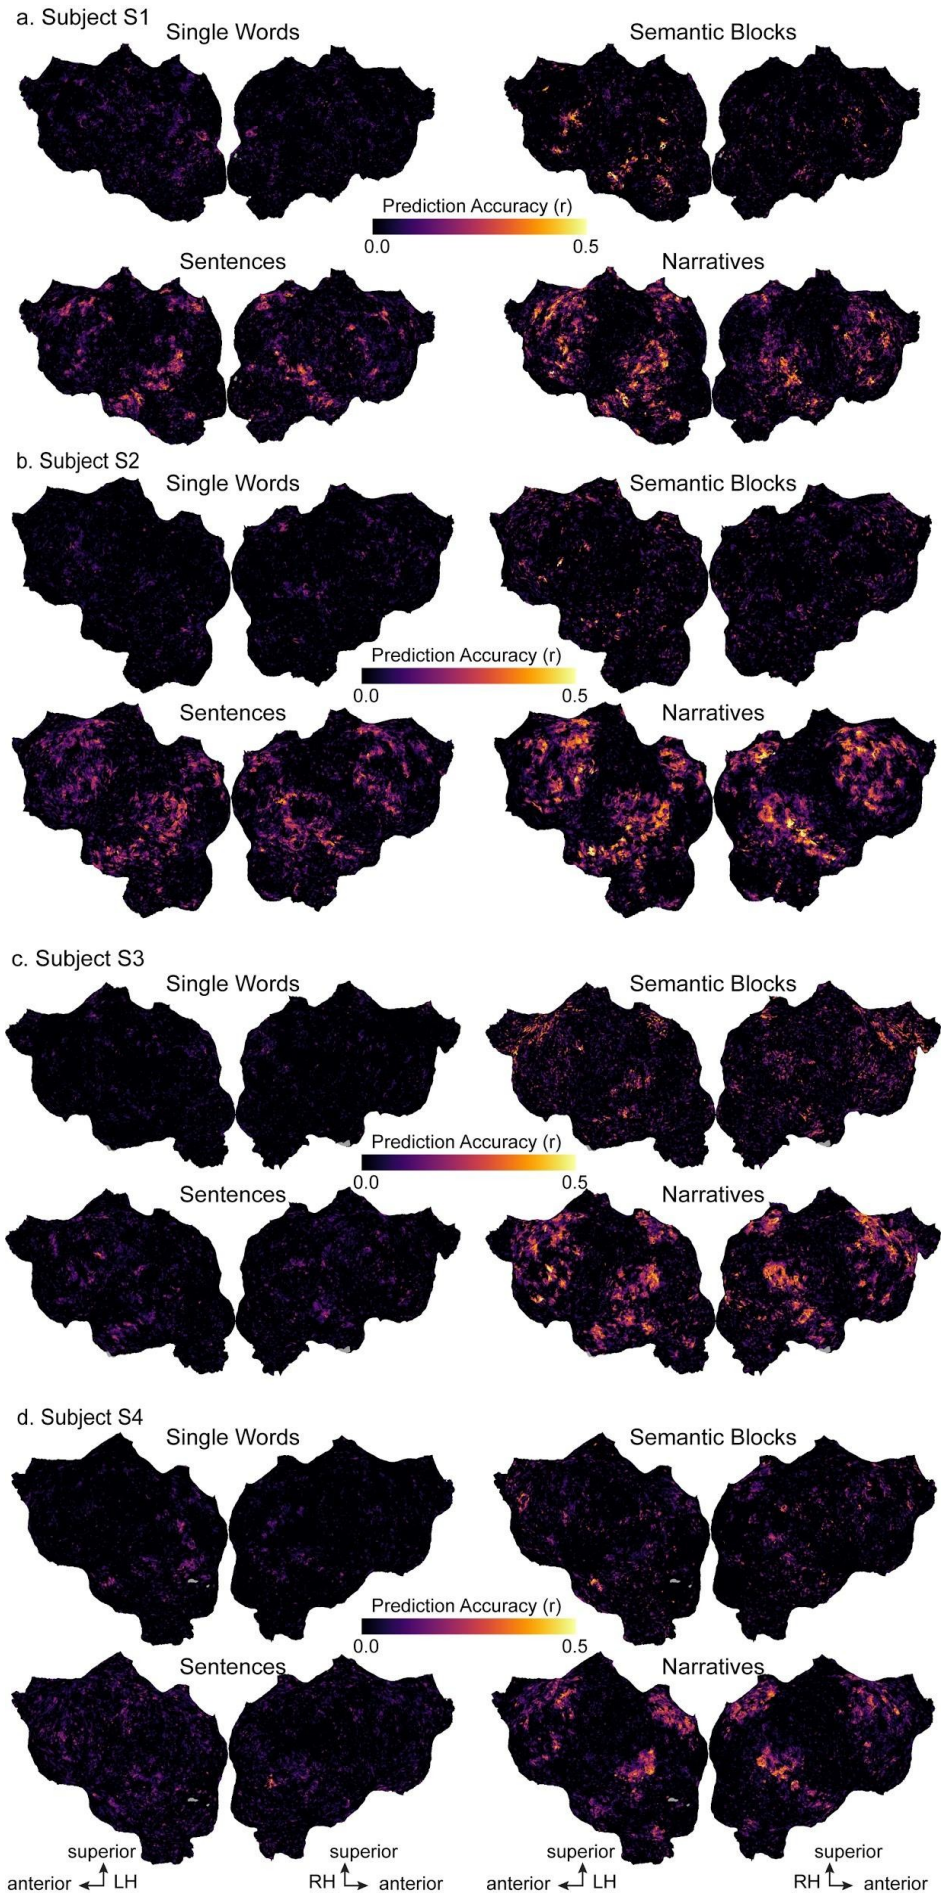



787 **Figure 4-2. Un-thresholded semantic model prediction accuracy for the four conditions across**  
788 **the cortical surface for all subjects.** Un-thresholded semantic model prediction accuracy in the four  
789 conditions is shown for all subjects on each subject's flattened cortical surface. Voxelwise modeling  
790 was first used to estimate semantic model weights in the four conditions. Semantic model prediction  
791 accuracy was then computed as the correlation ( $r$ ) between the subject's recorded BOLD activity to  
792 the held-out validation story and the BOLD activity predicted by the semantic model. Prediction  
793 accuracy is given by the color scale in the middle, and voxels that have a high prediction accuracy  
794 appear yellow. (LH: Left Hemisphere, RH: Right Hemisphere) In the Single Words condition,  
795 prediction accuracy is high in scattered voxels in primary visual cortex in subjects S1 and S4. In the  
796 Semantic Blocks condition, prediction accuracy is high in voxels in left STS and left angular gyrus in  
797 subjects S1 and S3. In addition, prediction accuracy is high in voxels in left Broca's area and IFG in  
798 subject S1, and prediction accuracy is high in voxels in bilateral SFS, SFG, and ventral precuneus in  
799 subject S3. In the Sentences condition, prediction accuracy is high in voxels in bilateral angular gyrus,  
800 STS, STG, MTG, anterior temporal lobe, IFG, sPMv, SFS, SFG, and ventral precuneus in subjects S1  
801 and S2. In the Narratives condition, prediction accuracy is high in voxels in bilateral angular gyrus,  
802 STS, STG, MTG, anterior temporal lobe, Broca's area and IFG, sPMv, SFS, SFG, ventral precuneus,  
803 and posterior cingulate gyrus in all subjects.
